**Direct regulation of cell cycle regulatory gene expression by NtrX to promote  
*Sinorhizobium meliloti* cell division**

Shenghui Xing, Lanya Zhang, Fang An, Leqi Huang, Xinwei Yang, Shuang Zeng,  
Ningning Li, Wenjia Zheng, Khadidja Ouenzar, Liangliang Yu, Li Luo\*

Shanghai Key Laboratory of Bio-energy Crops, School of Life Sciences, Shanghai  
University, Shanghai 200444, China

**Running title:** Positive control of *rhizobium* cell division by NtrX

\*Correspondence: [liluo@shu.edu.cn](mailto:liluo@shu.edu.cn).

24

25

26

27

28

## 29 **ABSTRACT**

30 Cell division of the alfalfa symbiont, *Sinorhizobium meliloti*, is regulated by the CtrA  
 31 signaling network. The gene expression of regulatory proteins in the network is  
 32 affected by nutrient signaling. In this study, we found that NtrX, one of the regulators  
 33 of nitrogen metabolic response, can directly regulate the expression of several  
 34 regulatory genes from the CtrA signaling network. Three sets of *S. meliloti ntrX*  
 35 mutants, including the plasmid insertion strain, the depletion strain and the  
 36 substitution of the 53<sup>rd</sup> aspartate (*ntrX*<sup>D53E</sup>) from a plasmid in the wild-type strain  
 37 (Sm1021), showed similar cell division defects, such as slow growth, abnormal  
 38 morphology of partial cells and delayed DNA synthesis. Transcript quantitative  
 39 evaluation indicated that the transcription of genes such as *ctrA* and *gcrA* was up-  
 40 regulated, while the transcription of genes such as *dnaA* and *ftsZ1* was down-  
 41 regulated in the insertion mutant and the strain of Sm1021 expressing *ntrX*<sup>D53E</sup>.  
 42 Correspondingly, inducible transcription of *ntrX* activates the expression of *dnaA* and  
 43 *ftsZ1*, but represses *ctrA* and *gcrA* in the depletion strain. The expression levels of  
 44 CtrA and GcrA were confirmed by western blotting, which were consistent with the  
 45 transcription data. The transcriptional regulation of these genes requires  
 46 phosphorylation of the conserved 53<sup>rd</sup> aspartate in the NtrX protein. The NtrX protein  
 47 binds directly to the promoter regions of *ctrA*, *gcrA*, *dnaA* and *ftsZ1* by recognizing  
 48 the characteristic sequence CAAN<sub>2-5</sub>TTG. Our findings reveal that NtrX is a novel  
 49 transcriptional regulator of the CtrA signaling pathway genes, and positively affects  
 50 bacterial cell division, associated with nitrogen metabolism.

51

## 52 **IMPORTANCE**

53 *Sinorhizobium meliloti* infects the host alfalfa and induces formation of nitrogen-  
 54 fixing nodules. Proliferation of rhizobia in plant tissues and cells is strictly controlled  
 55 in the early stage of symbiotic interactions. However, the control mechanism is not  
 56 very clear. Cell division of *S. meliloti* in the free-living state is regulated by the CtrA  
 57 signaling network, but molecular mechanisms by which the CtrA system is associated  
 58 with environmental nutrient signals (e.g., ammonia nitrogen) need to be further  
 59 explored. This study demonstrates that NtrX, a regulator of nitrogen metabolism,  
 60 required for symbiotic nodulation and nitrogen fixation by *S. meliloti* 1021, can act as  
 61 a transcriptional regulator of the CtrA signaling system. It may link nitrogen signaling  
 62 to cell cycle regulation in *Rhizobium* species.

63

## 64 **Key words:**

65 NtrX; Rhizobium; transcriptional regulation; cell division; CtrA

66

67

68

## 69 **INTRODUCTION**

70 *Caulobacter crescentus* is a model strain of  $\alpha$ -proteobacteria in molecular cell biology  
 71 (1). It takes advantage of one cell division to produce two cells with different shapes  
 72 and sizes (2). In recent years, a complex cell cycle regulatory network has been  
 73 revealed in this species. This network consists of multiple histidine kinases such as  
 74 CckA, DivL, DivJ, and PleC, a histidine phosphotransfer protein ChpT, response  
 75 regulators DivK and CpdR, and transcription regulators CtrA, GcrA, DnaA, SciP, and  
 76 MucR (1-6). Among these cell cycle regulators, CtrA and GcrA negatively regulate  
 77 cell division, which is opposite to DnaA. Although this network has been reported to  
 78 possibly mediate nutritional signals for regulating bacterial growth and proliferation,  
 79 the exact molecular mechanism is currently unclear.

80 *Sinorhizobium meliloti* is a model strain of rhizobia that can infect the host plant and

81 form nitrogen-fixing nodules. During symbiosis, the cell division of *S. meliloti* on the  
 82 surface of host plant alfalfa roots, at the front ends of extended infection threads and  
 83 in the infection zones of root nodules, is stringently controlled (7), but how cell  
 84 division is regulated is not very clear. Although NCR (Nodule Cysteine Rich) peptides  
 85 secreted by host plants are known to induce terminal differentiation of bacteroids in  
 86 host plant cells (8-11), several legumes do not produce NCR peptides. Therefore,  
 87 there may be other mechanisms that control cell division of symbiotic rhizobia in host  
 88 plants. Since *S. meliloti* and *C. crescentus* belong to  $\alpha$ -proteobacteria, based on the  
 89 research results of *C. crescentus*, with the aid of DNA sequence homology analysis,  
 90 many cell cycle regulatory genes such as *ctrA*, *ccrM*, *cpdR1*, *divJ*, *divK*, *gcrA* and  
 91 *pleC*, have been identified in *S. meliloti* (12-16). In addition, the hybrid histidine  
 92 kinase CbrA is linked to the CtrA regulatory system, which is an important regulator  
 93 of cell division in *S. meliloti* (17, 18). However, it is still unclear whether these  
 94 regulatory proteins conduct environmental nutrition signals (e.g., ammonia nitrogen)  
 95 and whether they play a regulatory role in the symbiotic process.

96 The NtrY/NtrX two-component system, first discovered in *Azorhizobium caulinodans*,  
 97 regulates nitrogen metabolism under free-living conditions and affects nodulation and  
 98 nitrogen fixation in the host plant *Sesbania rostrata* (19). Subsequently, *ntrY/ntrX*  
 99 homologous genes were found in *Rhizobium tropici* to regulate nitrogen metabolism  
 100 and symbiotic nodulation (20). NtrY/NtrX homologs regulate nitrate uptake in  
 101 *Azospirillum brasilense* and *Herbaspirillum seropedicae* (21, 22), and this regulatory  
 102 system has been found to simultaneously control nitrogen metabolism and cellular  
 103 redox homeostasis in *Rhodobacter capsulatus* (23). Moreover, NtrX is involved in the  
 104 regulation of cell envelope formation in *R. sphaeroides* (24). In *Brucella abortus*, the  
 105 histidine kinase NtrY participates in micro-oxygen signaling and nitrogen respiration  
 106 (25), while the response regulator NtrX controls the expression of respiratory  
 107 enzymes in *Neisseria gonorrhoeae* (26). Interestingly, the NtrY/NtrX system regulates  
 108 cell proliferation, amino acid metabolism and CtrA degradation in *Ehrlichia*  
 109 *chaffeensis* (27). Finally, NtrX is required for the survival of *C. crescentus* cells and

its expression is induced by low pH (28). These findings show that NtrY/NtrX appears to be a regulatory system for nitrogen metabolism, which may be involved in the regulation of cell division.

NtrX is an NtrC family response regulator protein, which consists of a receiver (REC) domain and a DNA-binding domain (29, 30). X-ray crystal diffraction results indicate that the NtrX protein of *B. abortus* can form a dimer; the REC domain is composed of 5  $\alpha$ -helices and 5  $\beta$ -sheets; the DNA-binding domain contains an HTH motif, which includes 4  $\alpha$ -helices. The three-dimensional structure of the C-terminus has not been resolved (30). *In vitro* experiments demonstrated that the NtrX protein of *B. abortus* can recognize and bind to the palindromic DNA sequence (CAAN<sub>3-5</sub>TTG) in the *ntrY* promoter region via the HTH motif to regulate gene transcription (29, 30). In *S. meliloti* 1021, our previous work found that NtrX protein can regulate bacterial growth and proliferation, flagellar synthesis and motility, succinoglycan production, and symbiotic nodulation and nitrogen fixation with the host plant alfalfa (31, 32). In the present study, we investigated the control mechanism by which NtrX regulates *S. meliloti* cell division at the transcriptional level.

## RESULTS

**Defects of cell division resulting from *ntrX* mutation in *S. meliloti*.** We previously constructed a plasmid insertion mutant of the *ntrX* gene in *S. meliloti* 1021, called as SmLL1 (31). This mutant grew slowly in LB/MC medium compared to wild-type Sm1021 (31). According to the determined growth curve, the doubling time of bacterial cell proliferation was calculated to be 180 mins for SmLL1 compared to 160 mins for the wild-type strain (33). Microscopic observation revealed that 5% to 10% of SmLL1 cells grown in the LB/MC broth up to the logarithmic phase exhibited morphological abnormalities (such as cell elongation, Y-shaped or V-shaped), whereas Sm1021 had almost no abnormally shaped cells (Fig. 1A-B). To determine whether the appearance of abnormally shaped cells of the SmLL1 strain is associated with the synthesis and segregation of genomic DNA, we synchronized the *S. meliloti* cells,

inoculated them in LB/MC broth, grew them for 180 mins, and then harvested the cells for flow cytometric analysis. The results showed that most of the Sm1021 cells were haploids, only a few diploids, whereas the most of SmLL cells were diploid (Fig. 1B), indicating a deceleration of replication and segregation of their genomic DNA as compared to the wild type. These observations indicate that the SmLL mutant has cell division defects.

Because the deletion of *ntrX* may be fatal, the deletion mutant in *S. meliloti* 1021 was not yet successfully screened. Therefore, we constructed a depletion strain that the *ntrX* gene on the genome has been deleted, but carries an IPTG inducible-expression *ntrX* gene from a plasmid ( $\Delta ntrX/pntrX$ ) to verify the above results. Optical microscopic observation showed that more than 30% of the *ntrX* depleted cells in LB/MC broth without IPTG displayed abnormal shapes (such as elongation and T-shaped), while in LB/MC broth with IPTG, almost no abnormal cells were observed (Fig. 1D). The depletion strain barely proliferated in LB/MC broth without IPTG, whereas it duplicated slowly with IPTG induction (Figure 1E), indicating that *ntrX* gene expression is required for the cell division of *S. meliloti*. Flow cytometric analysis showed that three peaks were detected in the depletion cells, including haploid and diploid in LB/MC broth without IPTG induction (Fig. 1F). After the one-hour induction of IPTG, the peaks were similar to the wild-type cells (Fig. 1F), indicating that genomic DNA replication and segregation of *S. meliloti* requires the expression of the *ntrX* gene.

NtrX, as a regulator of nitrogen metabolism, is composed of a REC domain and a DNA-binding domain (30). The phosphorylated NtrX has been reported in *C. crescentus* and *B. abortus* (28, 30), the putative phosphorylation site is predicted as the conserved 53<sup>rd</sup> aspartate residue (D53) on the REC domain (Fig. 4A-B). If the NtrX protein is indeed involved in the regulation of *S. meliloti* cell division, as described above, then the mutation of the conserved D53 residue would affect its regulatory function. To test this hypothesis, we tried to construct the substitutions of D53 (replaced by A, N or E) of NtrX from the genome of *S. meliloti* 1021, but were unable successfully to screen the mutants. As a result, we cloned the mutation gene

169 into the expression vector pSRK-Gm (34) and then introduced the recombinant  
170 plasmid into Sm1021. On the LB/MC/IPTG plate, we found that the strain expressing  
171 NtrX<sup>D53A</sup> or NtrX<sup>D53N</sup> almost did not form visible colonies with IPTG induction;  
172 however, the strain expressing NtrX<sup>D53E</sup> or NtrX formed many colonies in the same  
173 condition (Fig. S1). GFP-labeled *S. meliloti* cells (35) cultured in LB/MC/IPTG broth  
174 up to the logarithmic phase were observed under a fluorescence microscope, and more  
175 than 20% of Sm1021/*pntrX*<sup>D53E</sup> cells had abnormal morphology, while Sm1021/*pntrX*  
176 cells were almost normal (Fig. 1G). The growth curve determination also showed that  
177 the growth of Sm1021/*pntrX*<sup>D53E</sup> in LB/MC/IPTG broth was apparently slower than  
178 that of Sm1021/*pntrX* (Fig. 1G). Synchronized *S. meliloti* cells were subcultured into  
179 LB/MC/IPTG broth and grown for 180 mins for flow cytometric analysis. The results  
180 showed that only one sharp peak (haploid) was found in Sm1021/*pntrX* cells, whereas  
181 three peaks were detected in Sm1021/*pntrX*<sup>D53E</sup> cells, including haploid and diploid  
182 (Fig. 1H). These results suggest that the D53 phosphorylation of the NtrX protein is  
183 required for the regulation of cell division of *S. meliloti*.

184 **Transcription of cell cycle regulated genes under the regulation of NtrX in *S.***  
185 ***meliloti*.** Since NtrX is involved in controlling cell division of *S. meliloti*, does it  
186 regulate the transcription of cell cycle regulatory genes associated with CtrA system?  
187 To test this possibility, we performed a preliminary RNA-Seq analysis between  
188 Sm1021 and SmLL1 cells. The results indicated that many genes of cell cycle  
189 regulation such as *chpT*, *sciP*, *dnaA*, *ftsZ1*, *ccrM*, *podJ1*, *cckA*, *cbrA*, *pleD*, *divK*,  
190 *cpdR1*, *mucR* and *clpP* were differentially expressed in the mutant strain compared  
191 with the wild-type strain (Fig. S2 and Table S1), suggesting that transcription of many  
192 cell cycle regulatory genes is regulated by NtrX.

193 To confirm the above results in detail, we applied quantitative RT-PCR to analyze the  
194 transcript levels of cell cycle regulatory genes in *S. meliloti* cells. The synchronized  
195 Sm1021 and SmLL1 cells were subcultured into LB/MC broth for shaking incubation,  
196 and then total RNA was extracted from cells grown for every half an hour. The qRT-  
197 PCR results showed that the transcript level of the *ntrX* gene increased first in  
198 Sm1021, then decreased, and reached the maximum value in the cells cultured for 90



199 min, displaying a trend of cyclical changes, while the *ntrY* gene cyclical transcription  
200 trend was not obvious (Fig. 2A). Known cell cycle regulatory genes, such as *ctrA*,  
201 *gcrA* and *dnaA*, also exhibited a cyclical transcription trend (Fig. 2A and S3A).  
202 Compared to the wild-type cells, transcript levels of the *ntrX* gene were significantly  
203 low in the SmLL1 cells grown at different times, but the cyclical trend was unchanged,  
204 and cell cycle regulatory genes such as *dnaA*, *ftsZ1*, *pleC*, *chpT* and *cpdR1* showed  
205 similar down-regulation trend (Fig. 2A and S3A). Contrary to these results, *ctrA* was  
206 gradually up-regulated in the SmLL1 cells, and *gcrA*, *ccrM* and *ntrY* were  
207 significantly upregulated at the same time (Fig. 2A and S3A). These findings suggest  
208 that the NtrX protein may repress the transcription of genes such as *ctrA* and *gcrA* and  
209 activate the transcription of genes such as *dnaA* and *ftsZ1*.

210 We analyzed the transcripts of cell cycle regulatory genes in cells of the depletion  
211 strain to verify the above results. The qRT-PCR results showed that depleted cells  
212 cultured in LB/MC broth without IPTG had extremely low levels of *ntrX* transcripts,  
213 while transcripts of most cell cycle regulatory genes were high-level detected (Fig. 2B  
214 and S3B). After culturing the depleted cells in LB/MC broth with 1 mM IPTG for 1 h,  
215 numerous *ntrX* gene transcripts were detected (Fig. 2B and S3B). The transcript levels  
216 of cell cycle regulatory genes were significantly altered in depleted cells cultured in  
217 the broth with IPTG for 2 or 3 h compared to the cells cultured in the broth without  
218 IPTG: the transcription of *ctrA*, *gcrA* and *ccrM* was down-regulated; the transcription  
219 of *dnaA*, *ftsZ1*, *pleC*, *chpT* and *cpdR1* was up-regulated (Fig. 2B and S3B). These  
220 results further confirm that the NtrX protein represses the transcription of genes such  
221 as *ctrA* and *gcrA* and simultaneously activates the transcription of genes such as *dnaA*  
222 and *ftsZ1*.

223 We analyzed the transcript levels of major cell cycle regulatory genes in  
224 Sm1021/*pntrX*<sup>D53E</sup> and Sm1021/*pntrX* cells to determine whether the conserved D53  
225 residue on NtrX is essential for transcriptional regulation. The qRT-PCR results  
226 showed that transcripts of the *ntrX* gene were significantly increased in cells cultured  
227 in LB/MC broth containing IPTG for 2 h compared to the cells without IPTG  
228 treatment; meanwhile, the transcripts of *ctrA*, *gcrA* and *ntrY* were significantly



reduced or tended to decrease, while the transcripts of *dnaA* and *ftsZ1* genes were significantly increased (Fig. 2C). Contrary to the above results, as transcripts of the *ntrX*<sup>D53E</sup> gene increased significantly under IPTG induction, transcripts of *ctrA*, *gcrA*, and *ntrY* also increased significantly, while transcripts of *dnaA* and *ftsZ1* genes decreased significantly (Fig. 2C). These results further confirm that the NtrX protein represses the transcription of genes such as *ctrA* and *gcrA* and activates the transcription of genes such as *dnaA* and *ftsZ1*, and that this regulation depends on the D53 residue on NtrX.

To determine whether the expression of the CtrA system genes is regulated by NtrX in heterogeneous cells, the promoter-*uidA* fusions were co-transformed with *pntrX* or the empty vector (pSRK-Gm) into *E. coli* DH5 $\alpha$ , respectively. Quantitative analysis of GUS activities showed that the weaker activities of the promoter of *ctrA* or *gcrA* in the cells carrying *pntrX* than those cells with pSRK-Gm were observed (Fig. S3C). In contrast, the activity of the *dnaA* promoter is apparently elevated in the cells co-expressing *ntrX* compared with those cells carrying pSRK-Gm (Fig. S3C). These data supported the conclusion that NtrX negatively controls transcription of *ctrA* and *gcrA*, but positively regulates transcription of *dnaA*.

**Negative regulation of protein levels of CtrA and GcrA by NtrX in *S. meliloti*.** To determine whether protein levels of key cell cycle regulators are affected by the *ntrX* mutation, we first expressed His-tagged NtrX, CtrA and GcrA proteins in *E. coli*. After purification by nickel columns, rabbit polyclonal antibodies were prepared for immunoblotting assays (36). The results showed a varying trend of increasing first and then decreasing NtrX protein levels and a maximum occurring in the synchronized cells subcultured for 1.5 h (Fig. 3A). Unlike Sm1021, the total NtrX protein level in SmLL1 cells was apparently reduced and tended to increase gradually at different growth times (Fig. 3A). Contrary to the NtrX protein, the change trend of CtrA and GcrA protein levels in Sm1021 first decreased and then increased. The levels of these two proteins were apparently increased in SmLL1 cells compared to Sm1021 cells, (Fig. 3A). These results indicate that SmLL1 is a down-regulated

mutant of *ntrX* and that NtrX protein levels are negatively correlated with CtrA and GcrA proteins.

We evaluated the NtrX protein level in cells of the depletion strain grown in LB/MC broth by immunoblotting and found that cells cultured in the broth containing IPTG for 1 to 3 h high-level expressed NtrX protein (Fig. 3B). CtrA and GcrA proteins were high-level expressed in cells cultured in LB/MC broth without IPTG, whereas their levels were apparently reduced in cells cultured in broth containing IPTG for 1 to 3 h (Fig. 3B). These results also prove that NtrX protein levels are negatively correlated with CtrA and GcrA proteins.

To determine whether the D53 residue on the NtrX protein affects the protein levels of CtrA and GcrA, we performed immunoblot assays of lysates from Sm1021/*pntrX*<sup>D53E</sup> and Sm1021/*pntrX* cells. The results showed that the protein levels of NtrX and NtrX<sup>D53E</sup> increased apparently when cultured in LB/MC broth containing IPTG for 2-3 h (Fig. 3C). Under the same culture conditions, the protein levels of CtrA and GcrA were reduced somewhat in Sm1021/*pntrX* cells, while they were elevated to some extent in Sm1021/*pntrX*<sup>D53E</sup> cells (Fig. 3C). These results reaffirm that NtrX protein negatively regulates the expression of CtrA and GcrA in the dependent manner of the D53 residue.

**The 53<sup>rd</sup> aspartate residue as a phosphorylation site of *S. meliloti* NtrX.** The homologous NtrX proteins in  $\alpha$ -proteobacteria are composed of REC and DNA binding domains. The three-dimensional structure of the NtrX protein from *B. abortus* has been partially resolved (29, 30). Using this as a template, we reconstructed the 3D structure of the NtrX protein from *S. meliloti* and found that there were 5  $\alpha$ -helices and 5  $\beta$ -sheets connected by loops in the REC domain (Figure 4A-B). The conserved D53 is located at the end of the third  $\beta$ -sheet and predicted as a phosphorylated residue by PFAM.

From the report of *B. abortus*, the NtrY histidine kinase can phosphorylate NtrX *in vitro* (29, 30). We expressed and purified the NtrY kinase domain and NtrX protein of *S. meliloti* in *E. coli* for *in vitro* phosphorylation assays. Through Phos-Tag Gel assays, we found that the NtrY kinase domain was autophosphorylated, and phosphorylated

the NtrX protein *in vitro* (Fig. 4C). After mutating the 53<sup>rd</sup> aspartate to glutamate, phosphorylated NtrX protein was not detected by treatment of acetyl phosphate (data not shown). To further determine whether NtrX is phosphorylated *in vivo*, western blotting assays were performed using anti-NtrX antibodies after separating phosphorylated proteins of *S. meliloti* cells by Phos-Tag Gel. The results showed that more phosphorylated NtrX proteins were detected in Sm1021 cells than those in SmLL1 cells as the same as the unphosphorylated protein (Fig. 4D). To further verify that the D53 residue is the phosphorylation site of the NtrX protein, we applied the same method to analyze the phosphorylated NtrX protein level of Sm1021/*pntrX*<sup>D53E</sup> cells cultured in LB/MC/IPTG broth. The results showed that the ratio of phosphorylated NtrX protein compared to unphosphorylated protein in Sm1021/*pntrX* cells tended to increase, whereas the ratio in Sm1021/*pntrX*<sup>D53E</sup> cells tended to decrease (Fig. 4D). These results reveal that the D53 residue of NtrX is phosphorylated in *S. meliloti* cells.

**Direct binding of phosphorylated NtrX protein to the promoter DNA of key cell cycle regulatory genes.** To determine whether the NtrX protein of *S. meliloti* directly regulates the expression of cell cycle regulatory genes, we used anti-NtrX polyclonal antibodies with high specificity (Fig. S4) to perform chromatin immunoprecipitation experiments. Sequencing results showed that a total of 82 DNA fragments were specifically precipitated from Sm1021 cells, 60 of which were derived from the chromosome, while the other 22 fragments originated from the plasmids SymA and SymB (Fig. 5A). After sequence analysis in detail, we found that the promoter DNA fragments of cell cycle regulatory genes such as *ctrA*, *dnaA*, *mucR* and *cpdR1* were specifically enriched (Fig. 5B and Table S2). Due to of the recognition sites (CAAN<sub>3</sub>-<sub>5</sub>TTG) of NtrX on the *ntrY* gene promoter reported in *B. abortus* (30), we searched them in the precipitated DNA fragments, and found that nine of possible motifs are located in the promoter regions of cell cycle regulatory genes such as *ctrA*, *danA*, *gcrA* and *ftsZ1*(Fig. S5). To verify the ChIP-Seq results, we applied quantitative PCR to evaluate the level of genomic DNA fragments precipitated by anti-NtrX polyclonal antibodies. The results showed that the promoter regions of *ctrA*, *dnaA*, *gcrA* and

318 *ftsZ1* genes were enriched to different degrees (Fig. 5C), indicating that the NtrX  
319 protein in Sm1021 cells can interact directly with the promoter regions of the  
320 aforementioned cell cycle regulatory genes.

321 In Sm1021, the promoter DNA of the *ntrY* gene can directly interact with the NtrX  
322 protein (Fig. 5C), which is similar to the report in *B. abortus* (30). To further confirm  
323 the above results, we synthesized a biotin-labeled probe of *ntrY* promoter DNA  
324 (containing two **CAAN<sub>3-5</sub>TTG** motifs: **CAACACCGTTG** and **CAATGCGTTG**) for  
325 gel retardation assays. The results showed that phosphorylated NtrX specifically  
326 bound to it, forming two protein-DNA complexes (Fig. 6A). To determine whether the  
327 D53 phosphorylation of the NtrX protein is involved in the protein-DNA binding  
328 reaction, we replaced the phosphorylated NtrX protein with the NtrX<sup>D53E</sup> protein. The  
329 gel retardation results showed almost no protein-DNA complex formation (Fig. 6A),  
330 suggesting that the phosphorylation of D53 is essential for the binding of NtrX to the  
331 *ntrY* promoter region. The same method was used to analyze the binding ability  
332 between the phosphorylated NtrX protein and the biotin-labeled probe of *dnaA*  
333 promoter DNA (containing the **CAAACCCCTTG** motif) and found that they bound  
334 specifically to form a protein-DNA complex (Fig. 6B). We mutated the  
335 **CAAACCCCTTG** motif of the DNA probe to **CGGAACCCCG**, and found that the  
336 mutant probe virtually did not bind to the phosphorylated NtrX protein (Fig. 6B),  
337 suggesting that the base composition of the recognition site is important for NtrX  
338 binding reaction. We also used gel retardation assays to confirm whether the  
339 phosphorylated NtrX protein can specifically bind to biotin-labeled probes of *ctrA*,  
340 *gcrA* and *ftsZ1* promoter DNA (each containing a **CAAN<sub>3-5</sub>TTG** motif: **CAACCTTG**,  
341 **CAAACCTTG** and **CAATGGCTG**), and found that at least one protein-DNA  
342 complex was formed, respectively (Fig. 6C-E). These results indicate that the  
343 phosphorylated NtrX protein can bind specifically to the promoter regions of *ctrA*,  
344 *gcrA*, *dnaA* and *ftsZ1* *in vitro*.

345

## 346 DISCUSSION

In symbiotic nitrogen-fixing bacteria, rhizobia, the level of combined nitrogen as a signal not only regulates the expression of nitrogen-fixing genes, but also can affect cell growth and division. However, the molecular mechanism by which combined nitrogen levels regulate bacterial cell division is unclear. This work first revealed in *S. meliloti* that the nitrogen metabolism regulator NtrX directly regulates the transcription of cell cycle regulatory genes such as *ctrA*, *gcrA*, *dnaA* and *ftsZ1* by specifically interacting with the promoter regions, to promote cell division (Fig. 7), which provides a preliminary answer to the above question.

NtrX is a bacterial cell cycle regulator. Previous studies have suggested that NtrX is a regulator of nitrogen metabolism in bacterial cells because its mutants affect the utilization of nitrogen sources and NtrX is able to regulate amino acid metabolism and nitrogen oxidation (19-22, 25, 27). Decreased utilization of nitrogen sources would inevitably lead to weakened nucleic acid and protein synthesis, which would subsequently suppress the growth and proliferation of bacterial cells. This is one explanation to the effect of *ntrX* mutations on bacterial cell division. In *E. chaffeensis* cells, NtrX affected the stability of the CtrA protein through a post-translational mechanism (27), indicating that NtrX may act directly on the cell cycle regulatory system to regulate cell division. This work was carried out using *S. meliloti* as the study material and reveals the transcriptional control mechanism of the cell cycle regulatory genes mediated by the NtrX protein for the first time. This conclusion is supported by multiple experimental evidences: 1) three sets of *ntrX* gene mutation materials are defective in bacterial growth, cell morphology and genomic DNA synthesis (Fig. 1); 2) the transcript levels of cell cycle regulatory genes such as *ctrA*, *gcrA*, *dnaA* and *ftsZ1* are differentially altered in *ntrX* mutants (Fig. 2; 31; 3) the protein levels of CtrA and GcrA are correspondingly altered in the mutant and they were negatively correlated with the level of NtrX protein (Fig. 3); 4) the phosphorylated NtrX protein binds directly to the promoter regions of *ctrA*, *gcrA*, *dnaA* and *ftsZ1* (Fig. 5-6).

Cell division defects showed a little difference for three sets of *ntrX* mutants. For

example, the fewest cells of abnormal shapes were observed for SmLL1 cells, the most cells were found for the depletion cells (Fig. 1A-B, D, G). In fact, the depletion cells are easy to die in LB/MC medium without IPTG addition. Even in LB/MC broth containing different concentrations of IPTG, it still grew slower than the wild-type strain, Sm1021 (Fig. 1E). Irregular cell shapes of the *ntrX* mutant may be associated with genomic DNA content. We noticed that the flow cytometric peak of haploid cells is very sharp for Sm1021 or Sm1021/*pntrX*, but it was not for SmLL1, the depletion strain and Sm1021/*pntrX*<sup>D53E</sup> (Fig. 1C, F, I).

Differential expression of cell cycle regulatory genes exhibited some difference for three sets of *ntrX* mutation materials. First, qRT-PCR data showed larger expression differentials between SmLL1 and Sm1021 than those of the depletion strain (with and without IPTG induction) and the Sm1021/*pntrX*<sup>D53E</sup> strain (compared with Sm1021/*pntrX*, Fig. 2 and S3A-B). It may be result from the different cell cycle status of tested cells. Secondly, preliminary transcriptomic data showed more cell cycle regulatory genes differentially expressed between the synchronized cells of SmLL1 and Sm1021 than those cells subcultured in LB/MC broth (Fig. S2). Expression differentials of these genes from the cells subcultured in LB/MC broth were further determined by qRT-PCR (Fig. 2A and Fig. S3A), since this method is more sensitive for mRNA level analysis than RNA-seq from our experience.

Transcriptional regulation of *ctrA*, *gcrA* and *dnaA* mediated by NtrX is confident, though the expression differentials are varied from different materials or detected by different methods (Fig. 2 and S2). This conclusion was supported by heterogeneous expression and western blotting results (Fig. S3C and 3). Moreover, the expression results coincide with data of interactions between of NtrX and promoter regions of *ctrA*, *gcrA* and *dnaA* (Fig. 5-6). An NtrX homolog may bind to the promoter region of *dnaA* in *R. sphaeroides* based on the published ChIP-seq data (24). NtrX may bind to the recognition sites that contain a transcription start site to prevent transcriptional initiation of *ctrA* and *ntrY* (37) (Fig. 6A, 6C). We noticed that the bands of the complex between NtrX and the *gcrA* probe were relatively weak, which may be



405 associated with the selected probe (Fig. 6D).

406 NtrX phosphorylation has been reported in *B. abortus* and *C. crescentus*, and it is  
407 required for the formation of *ntrY* promoter DNA-NtrX complex in *B. abortus* (28-30).  
408 The same result was gained in *S. meliloti* (Fig. 4C and 6A), suggesting that NtrX  
409 phosphorylation is conserved in these species. Based on homology and  
410 conservativeness of NtrX proteins (Fig. 4A-B), the conserved 53<sup>rd</sup> aspartate was  
411 predicted as the phosphorylation residue. The mutation protein NtrX<sup>D53E</sup> was neither  
412 phosphorylated by acetyl phosphate *in vitro* (data not shown), nor by histidine kinase  
413 in *S. meliloti* cells (Fig. 4E), confirming that D53 is the real phosphorylation site. The  
414 NtrX<sup>D53E</sup> may mimic the phosphorylated NtrX protein to retain partial functions,  
415 which is completely different from NtrX<sup>D53A</sup> and NtrX<sup>D53N</sup> (Fig. S1).

416 Phosphorylated NtrX can recognize *cis* elements on the promoters of downstream  
417 regulated genes in bacterial species (24, 30). These *cis* elements are not completely  
418 consistent from different literatures. In *B. abortus*, the NtrX binding sites CAAN<sub>3</sub>.  
419 <sub>5</sub>TTG have been identified in the promoter region of *ntrY* by footprinting (30). In *R.*  
420 *sphaeroides*, the GCAN<sub>9</sub>TGC motifs have been suggested to be NtrX recognition sites  
421 by analyzing ChIP-seq data (24). These NtrX recognition sites from above two  
422 species share the palindromic sequence CAN<sub>x</sub>TG. We neither found GCAN<sub>9</sub>TGC  
423 motifs from the probes specifically binding to NtrX in *S. meliloti*, nor identified them  
424 by analyzing our ChIP-seq data (Fig. 5A, 6). Furthermore, at least one CAAN<sub>2-5</sub>TTG  
425 motif located in the promoter regions of cell cycle regulatory genes such as *ctrA*, *gcrA*,  
426 and *dnaA* were found (Fig. S5). These observations are not only consistent with our  
427 footprinting assays of the promoters of *visN* (36) and *dnaA* (data not shown), but also  
428 with our EMSA results (Fig. 6, S5). Interestingly, when the NtrX binding site is  
429 overlapped with one of transcriptional start sites of *ctrA* and *ntrY*, the expression of  
430 these genes is downregulated by NtrX (37) (Fig. 2, 3, 6). The possible explanation is  
431 that NtrX binding to the sites prevents transcription initiation of these genes. Although  
432 we identified that NtrX binds to the motifs of CAAN<sub>2</sub>TTG of the promoters of *visN*  
433 and *ctrA* (36) (Fig. 6C, S5), but we still don't know why NtrX recognition sites



434 contain the length-varied palindromic sequences.

435 The upstream kinase of NtrX may be not the cognate kinase NtrY, though the NtrY  
436 recombinant kinase from *S. meliloti* and *C. crescentus* phosphorylated NtrX protein *in*  
437 *vitro* (25) (Fig.4C). We noticed that both ORFs of *ntrY* and *ntrX* are overlapped and  
438 the repression of *ntrY* gene expression by NtrX in *S. eliloti* (31); Fig. 2). The  
439 phenotypes of the *ntrY* deletion mutant did not coincide with the *ntrX* mutant (16).  
440 These observations are consistent with the report that NtrY may be the phosphatase of  
441 NtrX in *C. crescentus* (38). Moreover, the expression of *ntrY* gene (not *ntrX*) is  
442 induced by micro-oxygen in *B. abortus* (25). The primary function of NtrX in bacteria  
443 was considered to regulate nitrogen metabolism. The nitrogen limitation signal  
444 transduction in bacteria is mainly mediated by the NtrB/NtrC system (39), so it cannot  
445 be ruled out that the NtrB/NtrC system can regulate the expression of *ntrX* under  
446 nitrogen lacking conditions. Under nitrogen rich conditions, the activity of NtrX may  
447 be regulated by an unknown kinase, which may be able to sense the level of combined  
448 nitrogen.

449

## 450 MATERIALS AND METHODS

451 **Strains and culture medium.** *Escherichia coli* DH5 $\alpha$  and BL21 were cultured in LB  
452 medium at 37 °C. *S. meliloti* (including Sm1021, SmLL1,  $\Delta ntrX/pntrX$  and  
453 derivatives) (31) were cultured in LB/MC medium at 28 °C. MOPS-GS broth was  
454 utilized for the cell synchronization of *S. meliloti* (33). The following antibiotics were  
455 added to the medium: kanamycin (Km), 50  $\mu$ g/ml; gentamicin (Gm), 10  $\mu$ g/ml;  
456 chloramphenicol (Cm), 30  $\mu$ g/ml; neomycin (Nm), 200  $\mu$ g/ml; streptomycin (Sm),  
457 200  $\mu$ g/ml.

458 **Recombinant plasmid construction.** Primers *PntrX1* and *PntrX2* bearing *HindIII*  
459 and *XbaI* digestion sites were used to amplify the *S. meliloti ntrX* gene (Table S3).  
460 The *ntrX* gene fragment was amplified using overlapping PCR primers NMF and  
461 NMR with the substitution of aspartate to glutamate, asparagine or alanine (Table S3).  
462 Overlapping PCR was performed as described by Wang (31) in 2013. The PCR

463 products were digested with *HindIII* and *XbaI* (Thermo) and ligated with digested  
464 pSRK-Gm (34) to obtain the recombinant plasmids *pntrX*, *pntrX*<sup>D53E</sup>, *pntrX*<sup>D53A</sup> and  
465 *pntrX*<sup>D53N</sup>. Each plasmid was transferred into Sm1021 to gain merodiploids.

466 After introducing *pntrX* into SmLL1 by triparental mating with help of MT616, the  
467 cells were streaked on LB/MC/Sm agar plates containing 1 mM IPTG and 10%  
468 sucrose to screen the *ntrX* depleted cells. The depletion strain ( $\Delta ntrX/pntrX$ ) was  
469 identified by PCR with the primers of *PntrYk1* and *PntrX2* (Table S3).

470 Primers *PntrYk1*/2, *PntrX*<sup>D53E</sup>/2, *PctrA1*/2, and *PgcrA1*/2 were used to amplify the  
471 NtrY kinase domain, *ntrX*<sup>D53E</sup>, *ctrA* and *gcrA*, respectively (Table S3). The DNA  
472 fragments amplified by high fidelity PCR (Takara) were digested with the appropriate  
473 restriction enzymes, and ligated into pET28b (Sangon) to obtain *pntrYk*, *pntrX*<sup>D53E</sup>,  
474 *pctrA* and *pgcrA*, use for recombinant protein purification. The cloned genes on the  
475 plasmids were identified by DNA sequencing (Sangon).

476 Primers *PctrAp1*/2, *PgcrAp1*/2, *PdnaAp1*/2 were used for amplification the promoter  
477 regions of the *ctrA*, *gcrA* and *dnaA*, respectively (Table S3). The PCR fragments were  
478 digested by appropriate restriction enzymes and ligated into pRG960 (40) to gain the  
479 recombinant plasmids p*PctrA*, p*PgcrA* and p*PdnaA*.

480 **Bacterial cell synchronization.** De Nisco's method was used for bacterial cell  
481 synchronization (33). *S. meliloti* colonies were selected from an agar plate, inoculated  
482 into 5 ml LB/MC broth, and shaken cultured at 28 °C, 250 rpm/min overnight. 100  $\mu$ l  
483 of the bacterial culture was transferred into 100 ml LB/MC broth and shaken cultured  
484 overnight until OD<sub>600</sub> = 0.1-0.15. The cells were collected by centrifugation (6,500  
485 rpm, 5 min, 4 °C), washed twice with sterilized 0.85% NaCl solution, resuspended in  
486 MOPS-GS synchronization broth, and shaken cultured for 270 min. After  
487 centrifugation, the cells were washed twice with sterilized 0.85% NaCl solution,  
488 resuspended in LB/MC broth, and grown at 28 °C.

489 **RNA extraction, purification and qRT-PCR.** The cells from 20 ml of bacterial  
490 cultures were collected by centrifugation (6,000 rpm, 5 min, 4°C), and washed twice  
491 with DEPC-treated water. RNA extraction was performed using 1 ml of Trizol (Life  
492 Technology). Total RNA was treated with genomic DNA Eraser (Takara) to remove

any remaining genomic DNA, and then transcribed to cDNA using a PrimeScript RT Reagent Kit (31). The qPCR reaction system included the following: SYBR<sup>®</sup> Green Real-time PCR Master Mix, 4.75  $\mu$ l; cDNA or DNA, 0.25  $\mu$ l; 10 pmol/ $\mu$ l primers, 0.5  $\mu$ l; ddH<sub>2</sub>O, 4.5  $\mu$ l. The reaction procedure is as follows: 95°C, 5 min; 95°C, 30 s; 55°C, 30 s; 72°C, 1 kb/min. The selected reference gene was SMc00128. The 2<sup>- $\Delta\Delta$ CT</sup> method was applied to analyze gene expression levels. All primers are listed in Table S3.

**Chromatin immunoprecipitation (ChIP).** ChIP was performed as described by Pini (4) using rabbit anti-NtrX polyclonal antibodies prepared by Wenyuange, Shanghai (36). In brief, Sm1021 cells (2ml, OD<sub>600</sub> of 0.8) were cross-linked in 10 mM PBS (pH7.6) containing 1% formaldehyde at room temperature for 10 min, and incubated on ice for 30 min. The cells were washed three times with PBS, treated with lysozyme, sonicated (EpiShear<sup>TM</sup>) on ice using 15 bursts of 30 sec (50% duty) at 40% amplitude. Lysates were diluted in 1 mL of ChIP buffer and pre-cleared with 50  $\mu$ l of protein-A agarose and 80  $\mu$ g BSA. Anti-NtrX polyclonal antibodies were added to the supernatant (1:1,000 dilution), incubated overnight at 4°C with 50  $\mu$ l of protein-A agarose beads pre-saturated by BSA, washed with low, high salt and LiCl buffer once and twice with TE buffer. The protein-DNA complexes were eluted using 200  $\mu$ l freshly prepared elution buffer (1% SDS, 0.1 M NaHCO<sub>3</sub>) supplemented with NaCl to a final concentration of 300 mM, and incubated for 6 h or overnight at 65°C to reverse the crosslinks. DNA was purified by a MinElute kit (QIAGEN) and resuspended in 40  $\mu$ l of Elution Buffer. DNA sequencing was completed using Illumina HiSeq 2000 in BGI. PCR was performed as the same as above qRT-PCR, and SMc00128 was used as an internal reference to normalize the data.

**Flow cytometry.** De Nisco's flow cytometry protocol was used (33). The cells from 4 ml of *S. meliloti* cultures were collected by centrifugation (6,000 rpm, 5 min, 4°C), washed twice with a 0.85% NaCl solution (stored at 4 °C). 250  $\mu$ l of cell suspension was mixed with 1 ml of 100% ethanol to fixation. The fixed cells were collected by centrifugation (6000 rpm, 3 min), and incubated in 1 ml of 50 mM sodium citrate buffer containing 4  $\mu$ g/ml RNase A at 50 °C for 1.5 hours. 1  $\mu$ l of 10  $\mu$ M SYTOX

523 Green dye (Sigma) was added to each sample. Each sample was assessed using a  
524 MoFlo XDF (Beckman Coulter) flow cytometer, and the results were analyzed by  
525 Summit 5.1 software (Beckman Coulter).

526 **EMSA (electrophoretic mobility shift assay).** EMSA was performed as described by  
527 Zeng (36). 30  $\mu$ l of the purified NtrX protein solution (200 ng/ $\mu$ l) was incubated with  
528 20  $\mu$ l of 100 mM acetyl phosphate (Sigma) in 50  $\mu$ l of 2X buffer (100 mM Tris-HCl  
529 pH 7.6, 100 mM KCl, 40 mM MgCl<sub>2</sub>) for 1 h at 28 °C. The remaining acetyl  
530 phosphate was removed by ultra-filtration (10 KD Amicon Ultra 0.5, Millipore). The  
531 protein-DNA binding reaction (20  $\mu$ l) included 3, 6, 15 ng phosphorylated NtrX  
532 protein, 2 or 40 nM DNA probe, 1X binding buffer, 5 mM MgCl<sub>2</sub>, 50 ng/ $\mu$ l  
533 poly(dI-dC), 0.05% NP-40, 1% glycerol, and ddH<sub>2</sub>O (up to 20  $\mu$ l). The mixture was  
534 incubated for 30 min at 28 °C, after which 1  $\mu$ l of loading buffer was added for PAGE.  
535 The protein-DNA complexes were transferred onto a nylon membrane (Thermo) and  
536 irradiated with a 254 nm UV lamp for 10 min. The protein-DNA complexes were  
537 detected using a Light Shift Chemiluminescent EMSA Kit (Thermo). Probes of *ntrY*,  
538 *ctrA*, *dnaA*, *gcrA* and *ftsZ* promoter DNA labeled with biotin were synthesized in  
539 Invitrogen, Shanghai, and listed in Table S3.

540 **NtrX phosphorylation assay and western blotting.** The procedure of NtrX  
541 phosphorylation assays was modified from Pini (15). 1 mg His-NtrX fusion protein  
542 (NtrXr) and His-NtrY kinase domain fusion protein (NtrY-Kr) purified through a Ni<sup>2+</sup>  
543 column were used for *in vitro* phosphorylation assays. 2 mM acetyl phosphate (Sigma)  
544 was mixed with 300  $\mu$ g NtrY-Kr in 1 ml of phosphorylation buffer (50 mM Tris-HCl  
545 pH 7.6, 50 mM KCl, 20 mM MgCl<sub>2</sub>) and then incubated for 1 h at room temperature.  
546 The remaining acetyl phosphate was removed using an ultra-filtration tube (10 KD  
547 Amicon Ultra 0.5, Millipore). 1, 3 and 10  $\mu$ g phosphorylated NtrY-Kr protein were  
548 added to 200  $\mu$ l of phosphorylation buffer containing 10  $\mu$ g NtrXr, and incubated  
549 overnight at 28 °C. Samples were separated by a Phos-Tag™ Acrylamide SDS-PAGE  
550 gel (Mu Biotechnology, Guangzhou). The gel was prepared by mixing 50  $\mu$ M Phos-  
551 tag™ acrylamide (29:1 acrylamide: N, N'-methylene-bis-acrylamide) with 100  $\mu$ M  
552 MnCl<sub>2</sub>.

Synchronized *S. meliloti* cells (Sm1021, SmLL1, Sm1021/*pntrX* and Sm1021/*pntrX*<sup>D53E</sup>) were subcultured in LB/MC broth containing 1 mM IPTG or not for 1 to 3 h. The cells from 1 ml culture were pelleted, resuspended in the buffer of 10 mM Tris-Cl, pH 7.5 and 4% SDS, incubated at room temperature for 5 min, mixed the loading dye, boiled for 10 min, and then loaded into the wells of Phos-tag™ acrylamide gels. Western blots were performed as described as Tang (41), with rabbit anti-NtrX (1:10000) antibodies (36). Chemiluminescent detection was performed using an ECL fluorescence colorimetric kit (Tiangen) and fluorescent signals were visualized using a Bio-Rad Gel Doc XR. Band intensities were evaluated by Image J (42).

To determine the protein levels between Sm1021 and SmLL1, synchronized cells were subcultured in 100 ml of LB/MC broth at 28 °C for half to three hours. The *ntrX* depleted cells, the synchronized cells of Sm1021/*pntrX* and Sm1021/*pntrX*<sup>D53E</sup> were subcultured in 100 ml of LB/MC broth containing 1 mM IPTG for one to three hours. ~ 10<sup>8</sup> cells were collected by centrifugation every half or one hour for each strain. 1 mg His-fused CtrA and GcrA proteins were purified through Ni<sup>+</sup> columns from supernatant of *E. coli* BL21 lysates. Rabbit anti-CtrA and anti-GcrA polyclonal antibodies were prepared by Hua'an Biotech, Hangzhou.

**Microscopy.** A 5-μl aliquot of fresh *S. meliloti* culture (OD<sub>600</sub> = 0.15) was placed on a glass slide and covered with a cover glass. The slide was slightly baked near the edge of the flame of an alcohol lamp for a few seconds, and observed under a phase contrast microscope (Zeiss). The cells carrying pHc60 (35) were observed in GFP mode, and the images were acquired using a CCD camera Axiocam 506 color (Zeiss). The exposure time was set to 10 ms in order to capture bacterial morphology. Scanning electron microscopy was performed as described by Wang (31) to further observe cell shapes of *S. meliloti* at the mid-log phase.

**DNA sequencing and analysis.** ChIP-Seq was performed by BGI (43). DNA library was prepared including DNA-end repair, 3'-dA overhang, ligation of methylated sequencing adaptor, PCR amplification and size selection (usually 100-300bp,

including adaptor sequence). Bioinformatics analysis was performed as follows. The ratio of N was over 10% in whole read. Removed reads in which unknown bases are more than 10%. The ratio of base whose quality was less than 20 was over 10%. Clean Parameter: SOAP nuke filter -l 15 -q 0.5 -n 0.01 -Q 2 -c 21. After filtering, the clean data was then mapped to the reference genome by SOAP aligner/SOAP2 (Version: 2.21t). BWA (Burrows-Wheeler Aligner, Version: 0.7.10) is also used to do genome alignment after evaluating its performance. Align Parameter: soap\_mm\_gz -p 4 -v 2 -s 35. MACS (Model-based Analysis for ChIP -Seq, version: MACS-1.4.2): the candidate Peak region was extended to be long enough for modeling. Dynamic Poisson Distribution was used to calculate p-value of the specific region based on the unique mapped reads. The region would be defined as a Peak when p-value < 1e-05. Peak Calling Parameter: macs14 -s 50 -g 6691694 -p 1e-5 -w --space 50 -m 10, 30. UCSC (University of California Santa Cruz) Genome Browser was used for reading peaks.

**Analysis of NtrX 3D structure.** The 3D structure of *S. meliloti* NtrX was reconstructed in the server of Swiss-Model using the 4d6y template from *B. abortus* in PDB (44). The 3D structures of NtrX were analyzed by the software Pymol (Delano Scientific).

## ACKNOWLEDGMENTS

This research was supported by the National Natural Science Foundation of China (31570241 to L.L.). We thanks to Dr. Yiwen Wang (Eastern Normal University) for help of SEM.

## AUTHOR CONTRIBUTIONS

L. L. designed research; S. X., L. Z., F. A., X. Y., L. H., S. Z., W. Z., and N. L. performed research; S. X., F. A., J. Y., L. Y. and L. L. analyzed data; L. L. and K. O. wrote the paper.

## REFERENCES

1. Laub MT, Shapiro L, McAdams HH. 2007. Systems biology of *Caulobacter*. *Annu Rev Genet* 41:429-41.
2. Laub MT, McAdams HH, Feldblyum T, Fraser CM, Shapiro L. 2000. Global analysis of the genetic network controlling a bacterial cell cycle. *Science* 290:2144-8.
3. Skerker JM, Laub MT. 2004. Cell-cycle progression and the generation of asymmetry in *Caulobacter crescentus*. *Nat Rev Microbiol* 2:325-37.
4. Panis G, Murray SR, Viollier PH. 2015. Versatility of global transcriptional regulators in alpha-Proteobacteria: from essential cell cycle control to ancillary functions. *FEMS Microbiol Rev* 39:120-33.
5. Jacobs C, Ausmees N, Cordwell SJ, Shapiro L, Laub MT. 2003. Functions of the CckA histidine kinase in *Caulobacter* cell cycle control. *Mol Microbiol* 47:1279-90.
6. Biondi EG, Reisinger SJ, Skerker JM, Arif M, Perchuk BS, Ryan KR, Laub MT. 2006. Regulation of the bacterial cell cycle by an integrated genetic circuit. *Nature* 444:899-904.
7. Jones KM, Kobayashi H, Davies BW, Taga ME, Walker GC. 2007. How rhizobial symbionts invade plants: the *Sinorhizobium-Medicago* model. *Nat Rev Microbiol* 5:619-33.



- 633 8. Van de Velde W, Zehirov G, Szatmari A, Debreczeny M, Ishihara H, Kevei Z, Farkas A,  
634 Mikulass K, Nagy A, Tiricz H, Satiat-Jeunemaître B, Alunni B, Bourge M, Kucho K,  
635 Abe M, Kereszt A, Maroti G, Uchiumi T, Kondorosi E, Mergaert P. 2010. Plant  
636 peptides govern terminal differentiation of bacteria in symbiosis. *Science* 327:1122-6.
- 637 9. Farkas A, Maróti G, Durgó H, Györgypál Z, Lima RM, Medzihradsky KF, Kereszt A,  
638 Mergaert P, Kondorosi É. 2014. *Medicago truncatula* symbiotic peptide NCR247  
639 contributes to bacteroid differentiation through multiple mechanisms. *Proc Natl Acad*  
640 *Sci U S A* 111:5183-8.
- 641 10. Penterman J, Abo RP, De Nisco NJ, Arnold MF, Longhi R, Zanda M, Walker GC. 2014.  
642 Host plant peptides elicit a transcriptional response to control the *Sinorhizobium*  
643 *meliloti* cell cycle during symbiosis. *Proc Natl Acad Sci U S A* 111:3561-6.
- 644 11. Montiel J, Downie JA, Farkas A, Bihari P, Herczeg R, Bálint B, Mergaert P, Kereszt A,  
645 Kondorosi É. 2017. Morphotype of bacteroids in different legumes correlates with the  
646 number and type of symbiotic NCR peptides. *Proc Natl Acad Sci U S A* 114:5041-  
647 5046.
- 648 12. Barnett MJ, Hung DY, Reisenauer A, Shapiro L, Long SR. 2001. A homolog of the CtrA  
649 cell cycle regulator is present and essential in *Sinorhizobium meliloti*. *J Bacteriol*  
650 183:3204-10.
- 651 13. Pini F, De Nisco NJ, Ferri L, Penterman J, Fioravanti A, Brilli M, Mengoni A, Bazzicalupo  
652 M, Viollier PH, Walker GC, Biondi EG. 2015. Cell Cycle Control by the Master  
653 Regulator CtrA in *Sinorhizobium meliloti*. *PLoS Genet* 11:e1005232.
- 654 14. Kobayashi H, De Nisco NJ, Chien P, Simmons LA, Walker GC. 2009. *Sinorhizobium*

655           meliloti CpdR1 is critical for co-ordinating cell cycle progression and the symbiotic  
656           chronic infection. *Mol Microbiol* 73:586-600.

657   15. Pini F, Frage B, Ferri L, De Nisco NJ, Mohapatra SS, Taddei L, Fioravanti A, Dewitte F,  
658           Galardini M, Brilli M, Villeret V, Bazzicalupo M, Mengoni A, Walker GC, Becker A,  
659           Biondi EG. 2013. The DivJ, CbrA and PleC system controls DivK phosphorylation and  
660           symbiosis in *Sinorhizobium meliloti*. *Mol Microbiol* 90:54-71.

661   16. Xue S, Biondi EG. 2019. Coordination of symbiosis and cell cycle functions in  
662           *Sinorhizobium meliloti*. *Biochim Biophys Acta Gene Regul Mech* 1862:691-696.

663   17. Robinson MD, Oshlack A. 2010. A scaling normalization method for differential  
664           expression analysis of RNA-seq data. *Genome Biol* 11:R25.

665   18. Schallies KB, Sadowski C, Meng J, Chien P, Gibson KE. 2015. *Sinorhizobium meliloti*  
666           CtrA Stability Is Regulated in a CbrA-Dependent Manner That Is Influenced by  
667           CpdR1. *J Bacteriol* 197:2139-2149.

668   19. Pawlowski K, Klosse U, de Bruijn FJ. 1991. Characterization of a novel *Azorhizobium*  
669           caulinodans ORS571 two-component regulatory system, NtrY/NtrX, involved in  
670           nitrogen fixation and metabolism. *Mol Gen Genet* 231:124-38.

671   20. Nogales J, Campos R, BenAbdelkhalek H, Olivares J, Lluch C, Sanjuan J. 2002.  
672           *Rhizobium tropici* genes involved in free-living salt tolerance are required for the  
673           establishment of efficient nitrogen-fixing symbiosis with *Phaseolus vulgaris*. *Mol Plant*  
674           *Microbe Interact* 15:225-32.

675   21. Ishida ML, Assumpção MC, Machado HB, Benelli EM, Souza EM, Pedrosa FO. 2002.  
676           Identification and characterization of the two-component NtrY/NtrX regulatory system

- 677 in *Azospirillum brasilense*. *Braz J Med Biol Res* 35:651-61.
- 678 22. Bonato P, Alves LR, Osaki JH, Rigo LU, Pedrosa FO, Souza EM, Zhang N, Schumacher  
679 J, Buck M, Wassem R, Chubatsu LS. 2016. The NtrY-NtrX two-component system is  
680 involved in controlling nitrate assimilation in *Herbaspirillum seropedicae* strain SmR1.  
681 *Febs j* 283:3919-3930.
- 682 23. Gregor J, Zeller T, Balzer A, Haberzettl K, Klug G. 2007. Bacterial regulatory networks  
683 include direct contact of response regulator proteins: interaction of RegA and NtrX in  
684 *Rhodobacter capsulatus*. *J Mol Microbiol Biotechnol* 13:126-39.
- 685 24. Lemmer KC, Alberge F, Myers KS, Dohnalkova AC, Schaub RE, Lenz JD, Imam S,  
686 Dillard JP, Noguera DR, Donohue TJ. 2020. The NtrYX Two-Component System  
687 Regulates the Bacterial Cell Envelope. *mBio* 11.
- 688 25. Carrica Mdel C, Fernandez I, Martí MA, Paris G, Goldbaum FA. 2012. The NtrY/X two-  
689 component system of *Brucella* spp. acts as a redox sensor and regulates the  
690 expression of nitrogen respiration enzymes. *Mol Microbiol* 85:39-50.
- 691 26. Attack JM, Srikhanta YN, Djoko KY, Welch JP, Hasri NH, Steichen CT, Vanden Hoven  
692 RN, Grimmond SM, Othman DS, Kappler U, Apicella MA, Jennings MP, Edwards JL,  
693 McEwan AG. 2013. Characterization of an ntrX mutant of *Neisseria gonorrhoeae*  
694 reveals a response regulator that controls expression of respiratory enzymes in  
695 oxidase-positive proteobacteria. *J Bacteriol* 195:2632-41.
- 696 27. Cheng Z, Lin M, Rikihisa Y. 2014. *Ehrlichia chaffeensis* proliferation begins with  
697 NtrY/NtrX and PutA/GlnA upregulation and CtrA degradation induced by proline and  
698 glutamine uptake. *mBio* 5:e02141.

- 699 28. Fernandez I, Sycz G, Goldbaum FA, Carrica MD. 2018. Acidic pH triggers the  
700 phosphorylation of the response regulator NtrX in alphaproteobacteria. Plos One 13.
- 701 29. Fernández I, Otero LH, Klinke S, Carrica MDC, Goldbaum FA. 2015. Snapshots of  
702 Conformational Changes Shed Light into the NtrX Receiver Domain Signal  
703 Transduction Mechanism. J Mol Biol 427:3258-3272.
- 704 30. Fernández I, Cornaciu I, Carrica MD, Uchikawa E, Hoffmann G, Sieira R, Márquez JA,  
705 Goldbaum FA. 2017. Three-Dimensional Structure of Full-Length NtrX, an Unusual  
706 Member of the NtrC Family of Response Regulators. J Mol Biol 429:1192-1212.
- 707 31. Wang D, Xue H, Wang Y, Yin R, Xie F, Luo L. 2013. The Sinorhizobium meliloti ntrX  
708 gene is involved in succinoglycan production, motility, and symbiotic nodulation on  
709 alfalfa. Appl Environ Microbiol 79:7150-9.
- 710 32. Calatrava-Morales N, Nogales J, Ameztoy K, van Steenberg B, Soto MJ. 2017. The  
711 NtrY/NtrX System of Sinorhizobium meliloti GR4 Regulates Motility, EPS I Production,  
712 and Nitrogen Metabolism but Is Dispensable for Symbiotic Nitrogen Fixation. Mol  
713 Plant Microbe Interact 30:566-577.
- 714 33. De Nisco NJ, Abo RP, Wu CM, Penterman J, Walker GC. 2014. Global analysis of cell  
715 cycle gene expression of the legume symbiont Sinorhizobium meliloti. Proc Natl Acad  
716 Sci U S A 111:3217-24.
- 717 34. Khan SR, Gaines J, Roop RM, 2nd, Farrand SK. 2008. Broad-host-range expression  
718 vectors with tightly regulated promoters and their use to examine the influence of  
719 TraR and TraM expression on Ti plasmid quorum sensing. Appl Environ Microbiol  
720 74:5053-62.

- 721 35. Cheng HP, Walker GC. 1998. Succinoglycan is required for initiation and elongation of  
722 infection threads during nodulation of alfalfa by *Rhizobium meliloti*. *Journal of*  
723 *Bacteriology* 180:5183-5191.
- 724 36. Zeng S, Xing S, An F, Yang X, Yan J, Yu L, Luo L. 2020. *Sinorhizobium meliloti* NtrX  
725 interacts with different regions of the *visN* promoter. *Acta Biochim Biophys Sin*  
726 (Shanghai) 52:910-913.
- 727 37. Schlüter JP, Reinkensmeier J, Barnett MJ, Lang C, Krol E, Giegerich R, Long SR,  
728 Becker A. 2013. Global mapping of transcription start sites and promoter motifs in the  
729 symbiotic  $\alpha$ -proteobacterium *Sinorhizobium meliloti* 1021. *BMC Genomics* 14:156.
- 730 38. Stein BJ, Fiebig A, Crosson S. 2021. The ChvG-ChvI and NtrY-NtrX Two-Component  
731 Systems Coordinately Regulate Growth of *Caulobacter crescentus*. *J Bacteriol*  
732 203:e0019921.
- 733 39. Szeto WW, Nixon BT, Ronson CW, Ausubel FM. 1987. Identification and  
734 characterization of the *Rhizobium meliloti* *ntrC* gene: *R. meliloti* has separate  
735 regulatory pathways for activation of nitrogen fixation genes in free-living and  
736 symbiotic cells. *J Bacteriol* 169:1423-32.
- 737 40. Van den Eede G, Deblaere R, Goethals K, Van Montagu M, Holsters M. 1992. Broad  
738 host range and promoter selection vectors for bacteria that interact with plants. *Mol*  
739 *Plant Microbe Interact* 5:228-34.
- 740 41. Tang G, Xing S, Wang S, Yu L, Li X, Staehelin C, Yang M, Luo L. 2017. Regulation of  
741 cysteine residues in LsrB proteins from *Sinorhizobium meliloti* under free-living and  
742 symbiotic oxidative stress. *Environ Microbiol* 19:5130-5145.

- 743 42. Schneider CA, Rasband WS, Eliceiri KW. 2012. NIH Image to ImageJ: 25 years of image  
744 analysis. Nat Methods 9:671-5.
- 745 43. Park PJ. 2009. ChIP-seq: advantages and challenges of a maturing technology. Nat Rev  
746 Genet 10:669-80.
- 747 44. Arnold K, Bordoli L, Kopp J, Schwede T. 2006. The SWISS-MODEL workspace: a web-  
748 based environment for protein structure homology modelling. Bioinformatics 22:195-  
749 201.

750  
751  
752

## 753 FIGURE LEGENDS

754 **Fig. 1.** Cell division defects of *S. meliloti ntrX* mutants in LB/MC broth.

755 (A, B, D, G) Cell morphology and sizes of *ntrX* mutants under a light, scanning  
756 electron or fluorescence microscope. Red arrows, abnormal cells; bars, 2µm. Sm1021  
757 and SmLL1 cells were grown in LB/MC broth to logarithmic phase in A and B. The  
758 depletion cells ( $\Delta ntrX/pntrX$ ) carrying pHc60 (35) were grown in LB/MC broth with  
759 or without 1 mM IPTG for two hours in D. The cells of Sm1021/*pntrX* and  
760 Sm1021/*pntrX*<sup>D53E</sup> carrying pHc60 were grown in LB/MC broth containing 1 mM  
761 IPTG for two hours. (C, F, I) Genomic DNA content of *ntrX* mutants was determined  
762 by flow cytometry. 1C, haploid; 2C, diploid. Synchronized cells of Sm1021, SmLL1,  
763 Sm1021/*pntrX* and Sm1021/*pntrX*<sup>D53E</sup> were grown in LB/MC broth for three hours in  
764 C and I. Latter two strains were also incubated with 1mM IPTG in I. The depletion  
765 cells were grown in LB/MC broth with or without 1 mM IPTG for one hour in F. (E,  
766 H) Growth curves of the *ntrX* depletion strain and Sm1021/*pntrX*<sup>D53E</sup> in LB/MC broth  
767 with 1 mM IPTG. Error bars, ±SD.

768 **Fig. 2.** Differential expression of cell cycle regulatory genes in *ntrX* mutants  
769 evaluated by qRT-PCR.

770 Synchronized cells of Sm1021 and SmLL1 were grown in LB/MC broth for half to

three hours in **A**. The depletion cells were grown in LB/MC broth with 1 mM IPTG for one to three hours, while the cells were incubated without IPTG for one hour as a control in **B**. Synchronized cells of Sm1021/*pntrX* and Sm1021/*pntrX*<sup>D53E</sup> were grown in LB/MC broth with 1 mM IPTG for three hours in **C**. Error bars,  $\pm$ SD. The student t-test was used for significance analysis. \*, P<0.05; \*\*, P<0.001.

**Fig. 3.** Protein levels of NtrX, CtrA and GcrA in the *ntrX* mutant as evaluated by Western blotting.

Synchronized cells of Sm1021 and SmLL1 were grown in LB/MC broth for half to three hours in **A**. The depletion cells were grown in LB/MC broth containing 1 mM IPTG for one to three hours, while the cells were incubated without IPTG for one hour as a control in **B**. Synchronized cells of Sm1021/*pntrX* and Sm1021/*pntrX*<sup>D53E</sup> were grown in LB/MC broth containing 1 mM IPTG for one to three hours in **C**. CB, total proteins stained by Coomassie brilliant blue. N/TP, C/TP or G/TP, the blot intensity of NtrX, CtrA or GcrA (the larger one) divided the intensity of the strongest band of the total proteins stained by Coomassie brilliant blue. The intensity data were collected using Image J (42).

**Fig. 4.** Phosphorylation of the 53<sup>rd</sup> aspartate residue in the NtrX protein.

(**A**) Alignment of NtrX receiver domain from three bacterial species. The amino acid sequence of each protein was obtained from NCBI. Secondary structures of the receiver domain are shown as green lines (loops), yellow arrows ( $\beta$ - sheets) and red bars ( $\alpha$ -helixes). Both the aspartate residue in the box and the asterisk represent the predicted phosphorylation site from Pfam. Ba2308, *B. abortus* bv. 1 str. 2308; Sm1021, *S. meliloti* 1021; CcN1000, *C. crescentus* N1000. (**B**) 3D structure of the NtrX receiver domain of *S. meliloti* NtrX. It was reconstructed using *B. abortus* homolog protein (PDB: 4d6y) as a template in Swiss-Model. Possible electrostatic interactions associated with the 53<sup>rd</sup> aspartate residue are labeled via Pymol. (**C**) *In vitro* NtrX phosphorylation catalyzed by the NtrY kinase domain. NtrY-Kr, His-NtrY kinase domain fusion protein (1, 3 and 10  $\mu$ g); NtrXr-P, phosphorylated NtrXr (10  $\mu$ g); Ac-Pi, acetyl phosphate (2 mM). (**D-E**) *In vivo* phosphorylation of *S. meliloti* NtrX.



800 Phosphorylated NtrX proteins from *S. meliloti* cells were separated by Phos-Tag gel  
801 and detected by Western blotting of anti-NtrX polyclonal antibodies. *S. meliloti* 1021  
802 cells carrying *pntxX* or *pntxX*<sup>D53E</sup> were grown in LB/MC broth with 1mM IPTG for 1  
803 to 3 h. ~ 1 µg of total protein was loaded into each well. NP/N, the intensity of  
804 phosphorylated proteins divided the intensity of non-phosphorylated proteins. The  
805 intensity data were collected using Image J (42).

806 **Fig. 5.** NtrX binding to the promoter DNA of key cell cycle regulatory genes *in vivo*.  
807 (A) Genome-wide distribution of DNA fragments precipitated by anti-NtrX antibodies  
808 through a ChIP-Seq assay. (B) Peak maps showing the promoter fragments of *ctrA*  
809 and *dnaA* in the ChIP-Seq assay. Red bars, the putative NtrX recognition site,  
810 CAAN<sub>2-5</sub>TTG. (C) Enrichment of DNA fragments containing *ctrA*, *gcrA* and *dnaA*  
811 promoters determined by ChIP-qPCR. IgG, *S. meliloti* lysate treated by IgG as a  
812 negative control. Error bars, ±SD. The student t-test was used for significance analysis.  
813 \*, P<0.05.

814 **Fig. 6.** Phosphorylated NtrX proteins binding to the promoter DNA of *ntrY* (A), *ctrA*  
815 (B), *dnaA* (C), *gcrA* (D) and *ftsZ* (E) *in vitro*. His-NtrX<sup>D53E</sup>, the His-NtrX fusion  
816 protein containing a substitution of D53E in (A). Probe PdnaAs is the DNA probe  
817 PdnaA that CAAAACCCTTG was replaced by CGGAACCCCG in (B). D/P  
818 complex, DNA-protein complex; competitor, the DNA probe without biotin labeling.  
819 0, 3, 6 and 15 ng His-NtrX proteins mixed with each probe (2 nM), respectively. TSS,  
820 transcriptional start sites from the literature (37). Blue bars, probes for EMSA; red  
821 balls, the putative recognition site of NtrX, CAAN<sub>2-5</sub>TTG; green balls, the binding  
822 sites of CtrA (12, 13).

823 **Fig. 7.** An NtrX-mediated transcriptional control system for cell cycle progression of  
824 *S. meliloti*

825  
826  
827

**A**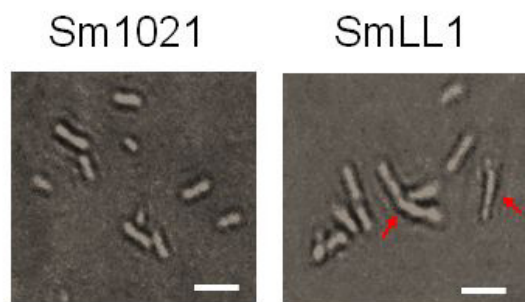**B**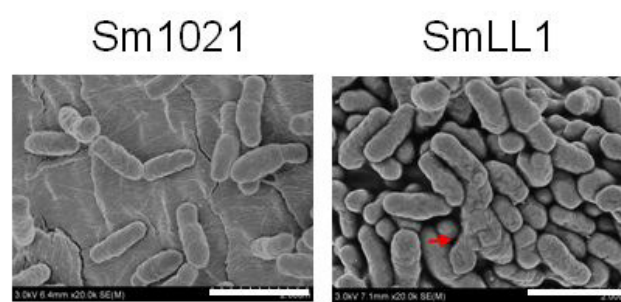**C**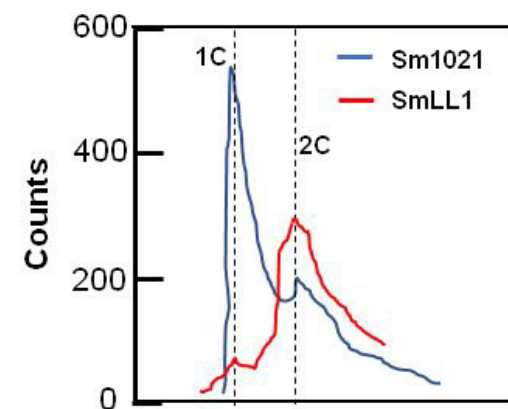**D**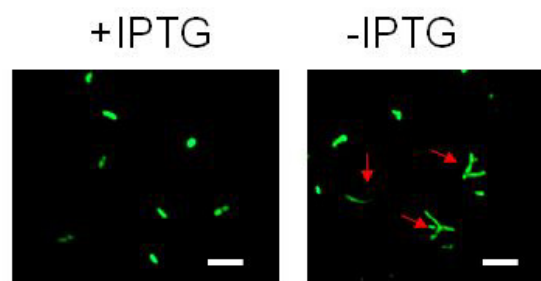**E**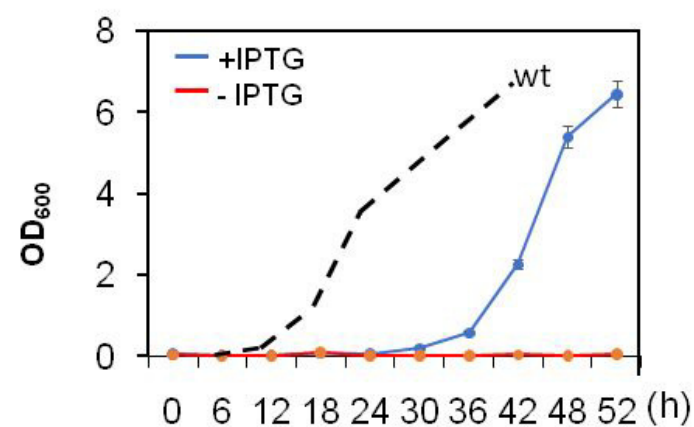**F**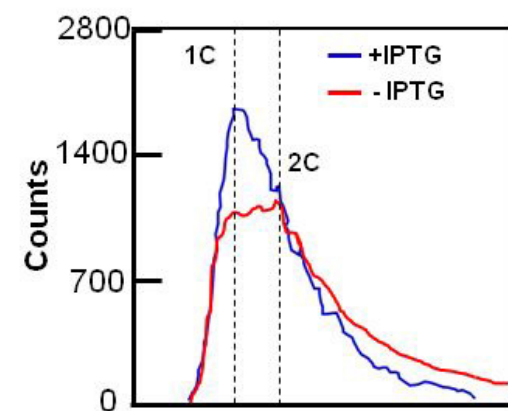**G**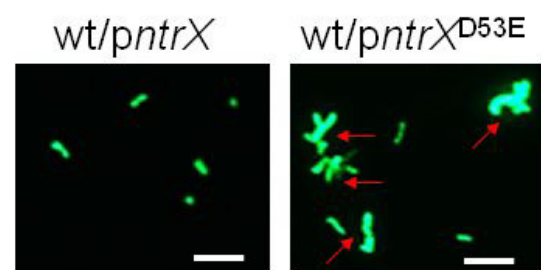**H**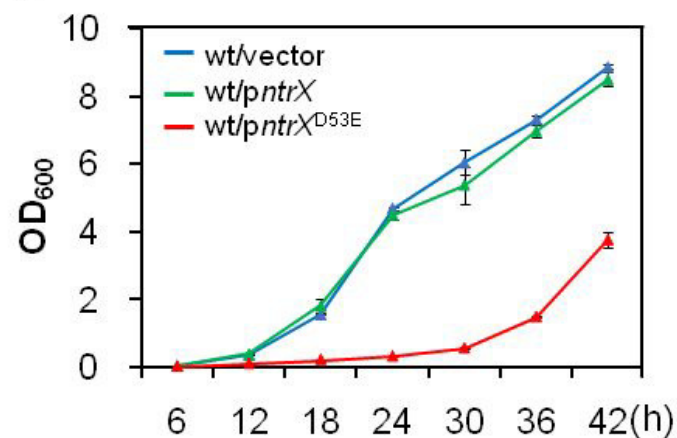**I**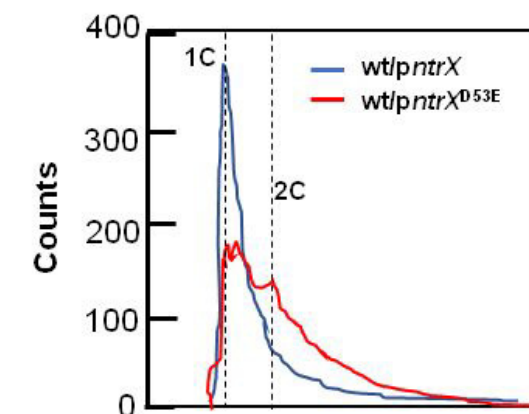

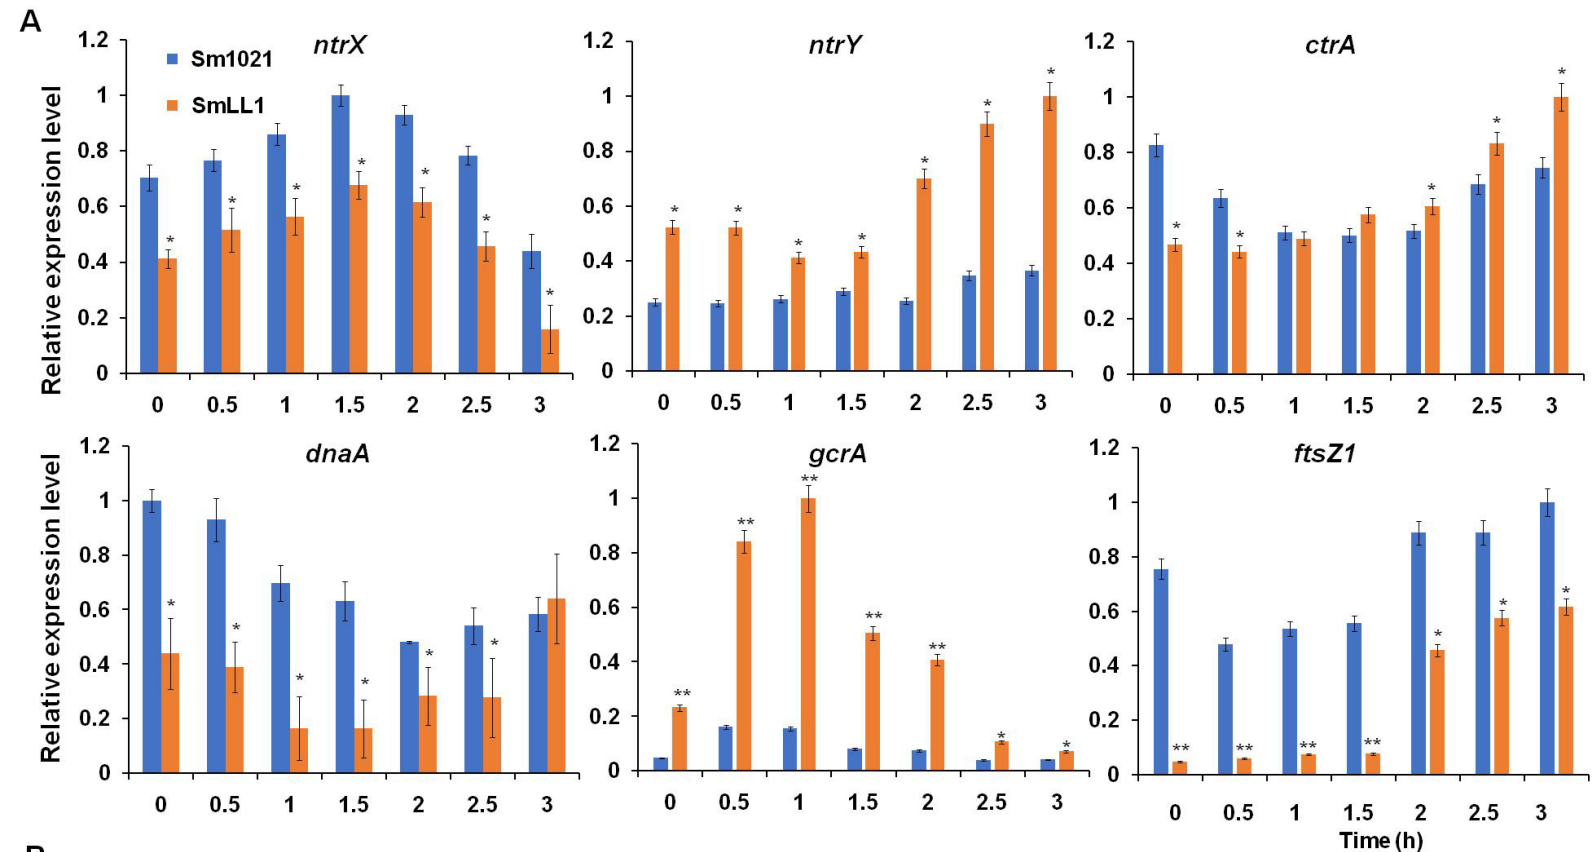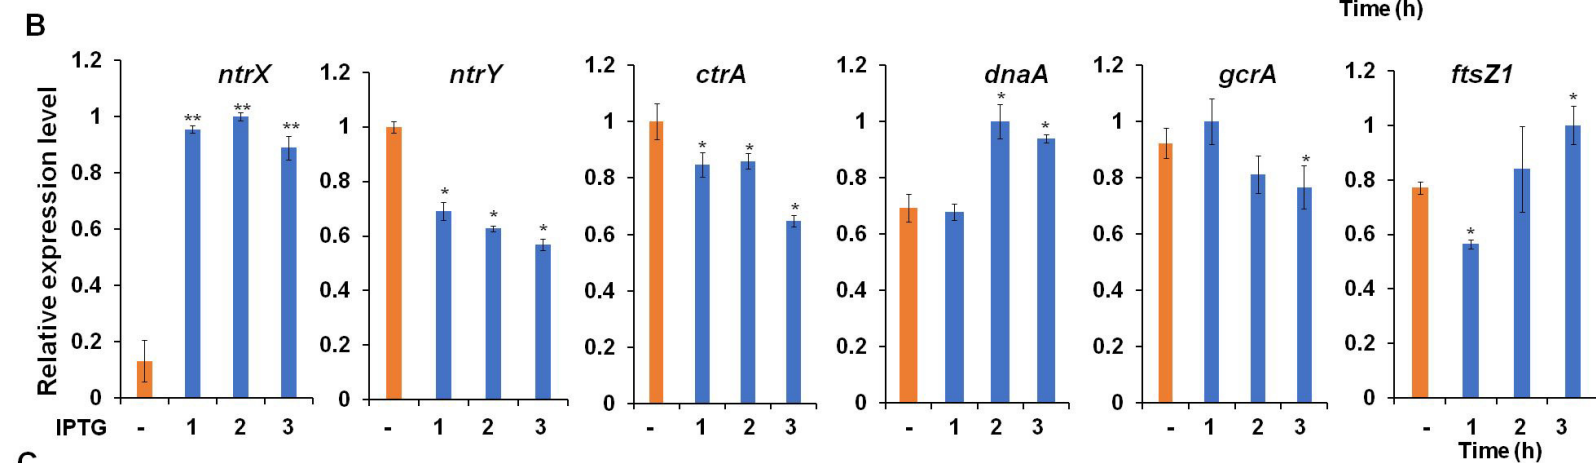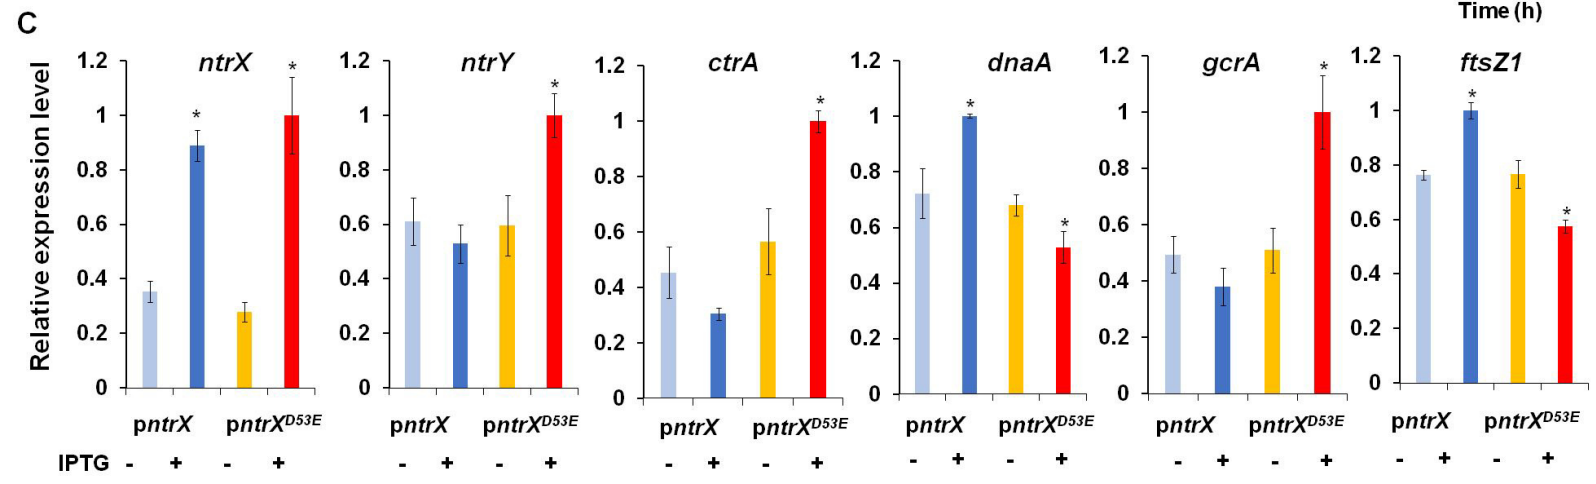

**A**

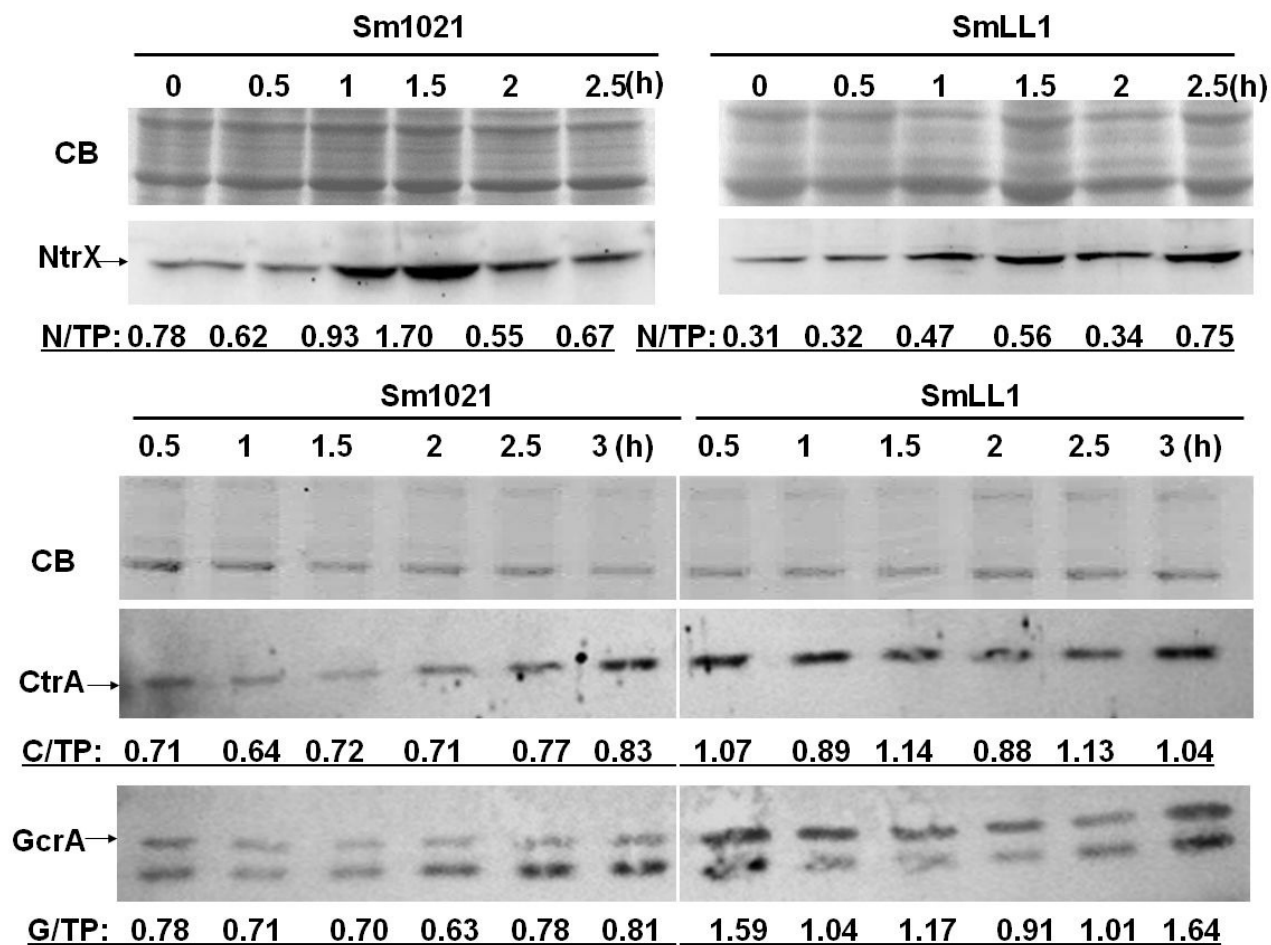

**B**

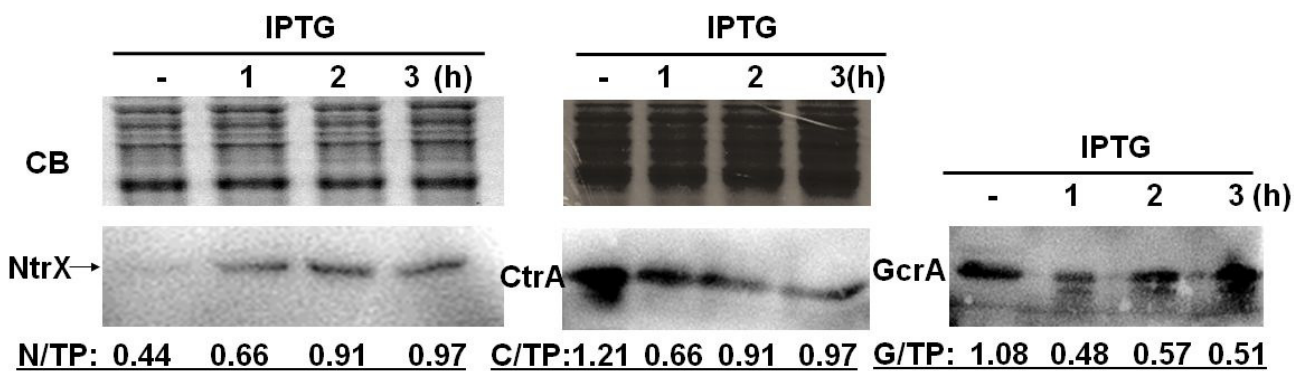

**C**

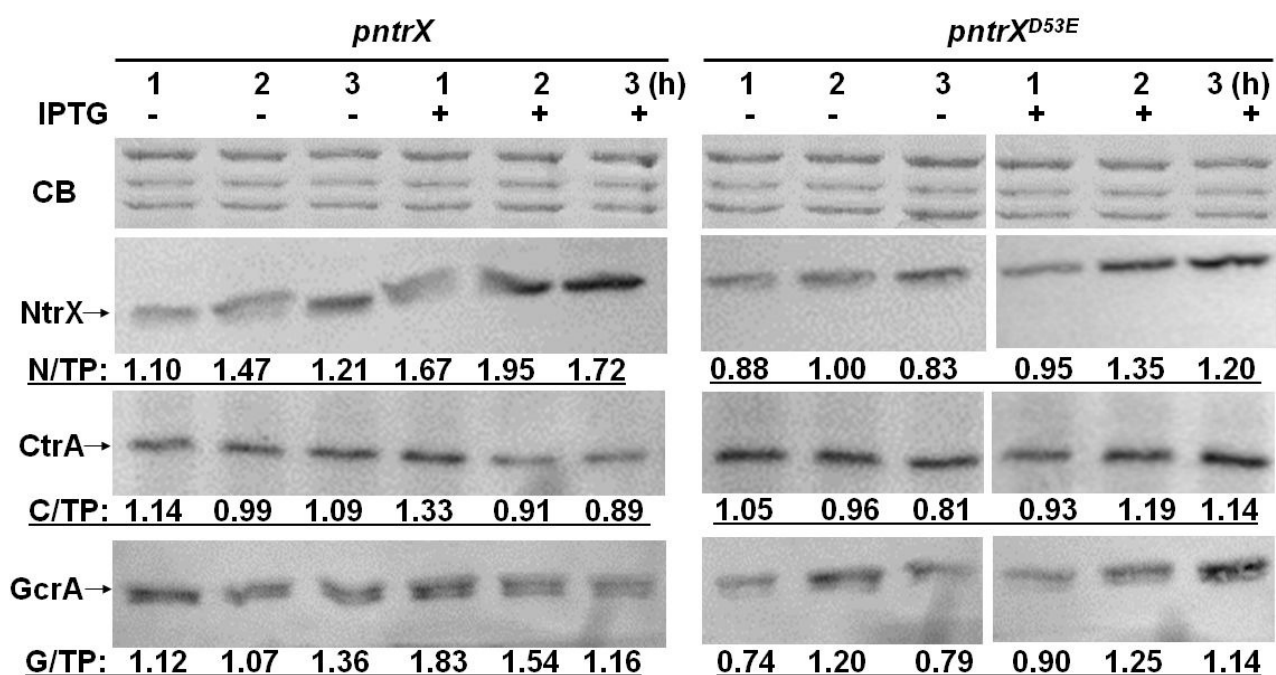



**A**

|         |   |                                                                                                                       |     |
|---------|---|-----------------------------------------------------------------------------------------------------------------------|-----|
| Ba2308  | 1 | MAADILVVDDEVDIRDLVAGILSDEGHETRTAFDADSALAAINDRAPRLVFLDIWLQGSRLDGLALLDEIKKQHPPELVVMISGHGNIETAVSAIRRGAYDFIEKPFKADRLILVA  | 116 |
| Sm1021  | 1 | MAADILVVDDEEDIREIVSGILSDEGHETRTAFDSESALAAINDRVPRLLIFLDIWMQGSKLDGLALLDEIKNRHPDLPVVMISGHGNIETAVSAIKRGAYDFIEKPFKADRLILIA | 116 |
| CeN1000 | 1 | MSADVLVVDDEADIRDLVAGILEDEGYAVRTAADSDQALAAIRARKPALLVLDIWMQGGMDGLELLDMVKALDADLPVIMISGHGNIETAVSAIKRGAYEFLEKPFKSDRLLLLIV  | 116 |

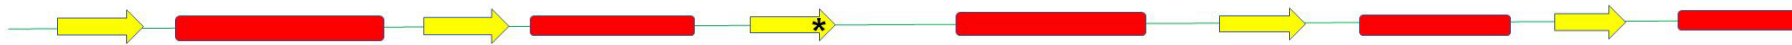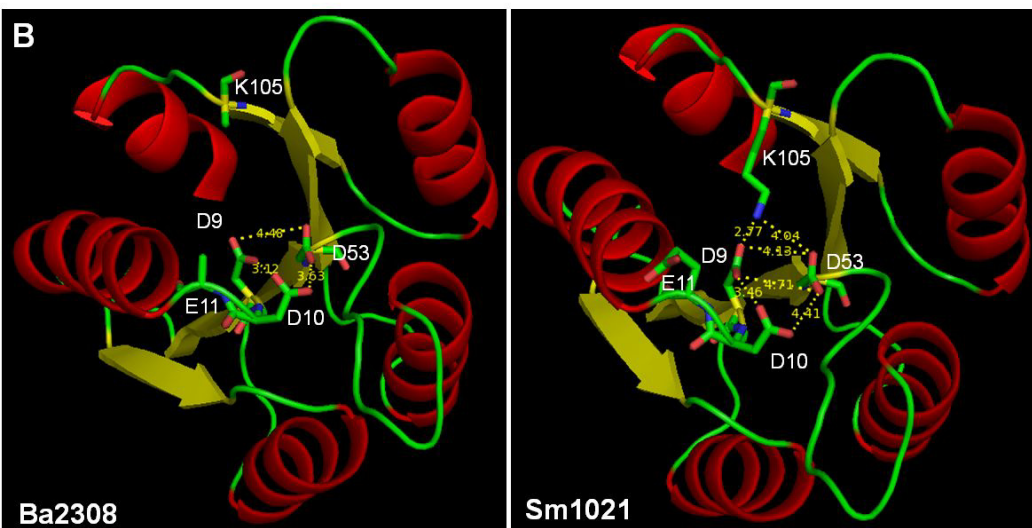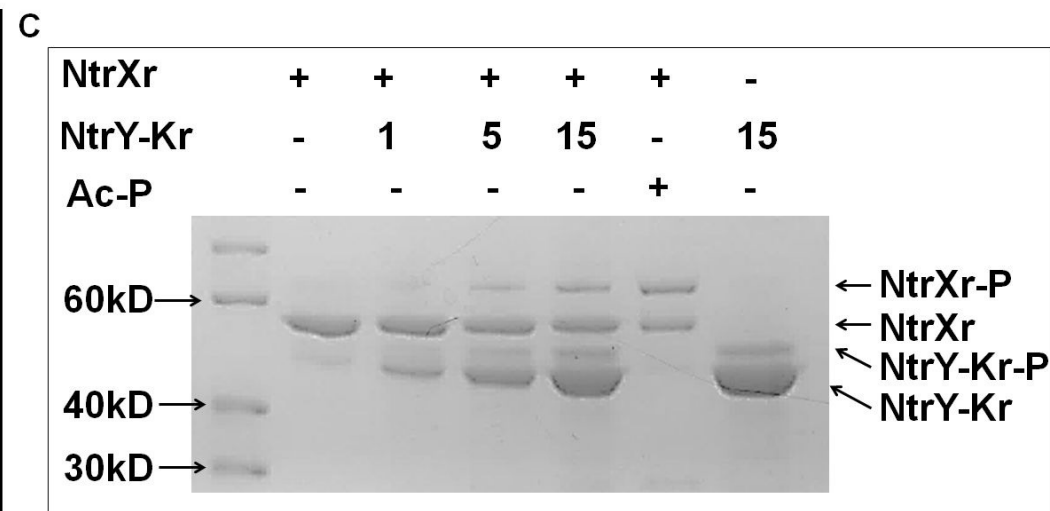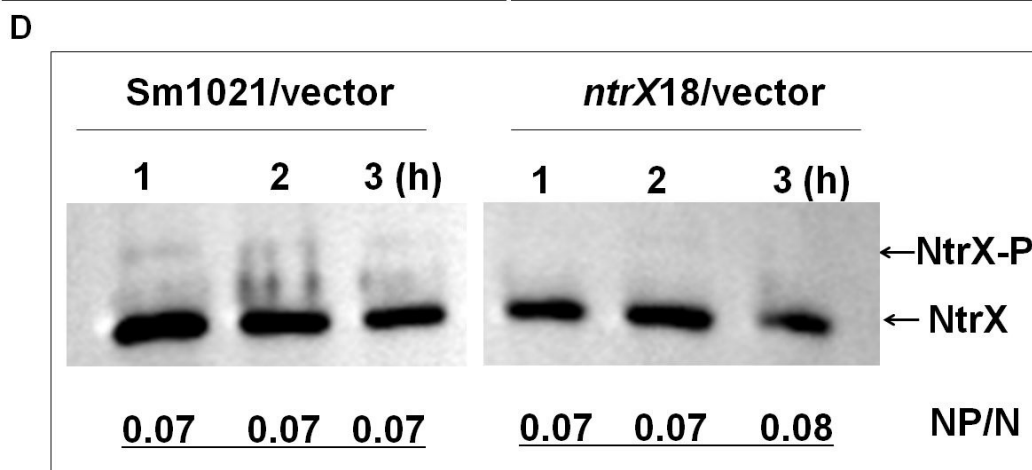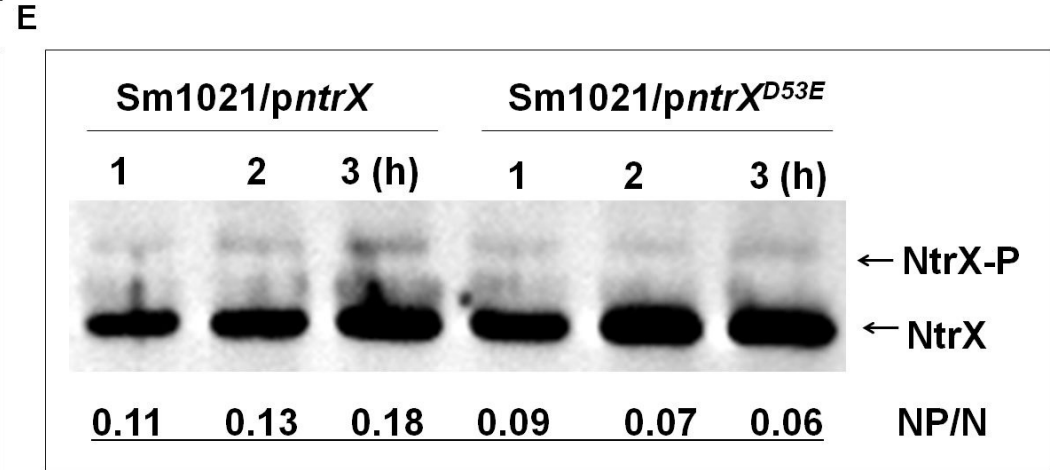

**A**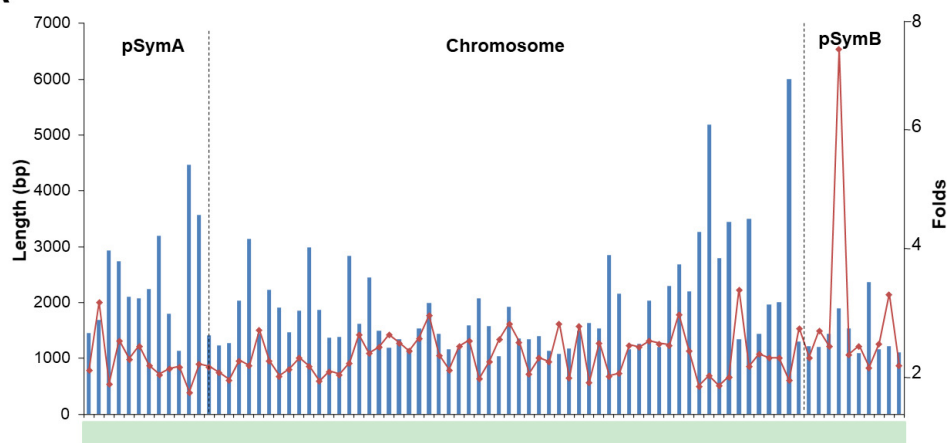**B**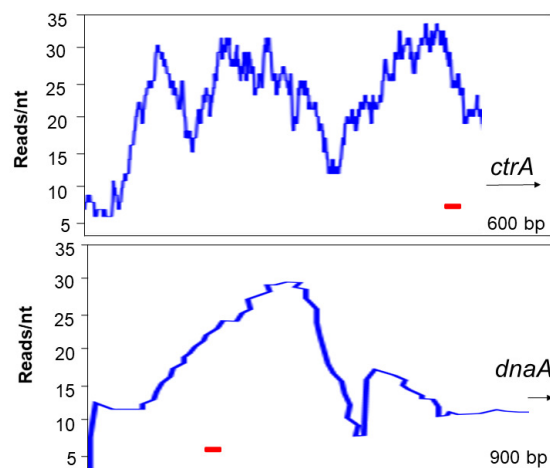**C**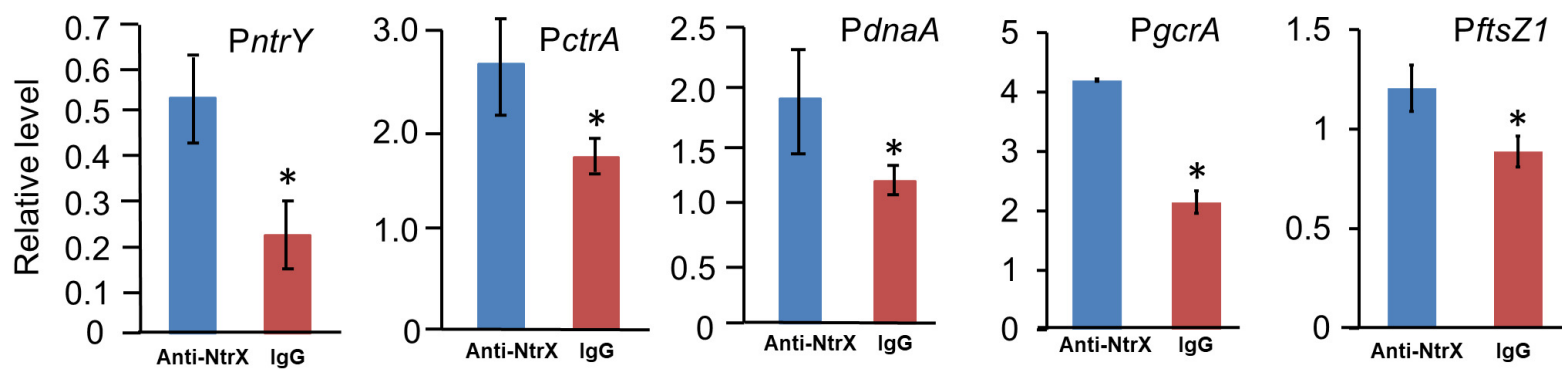

**A**

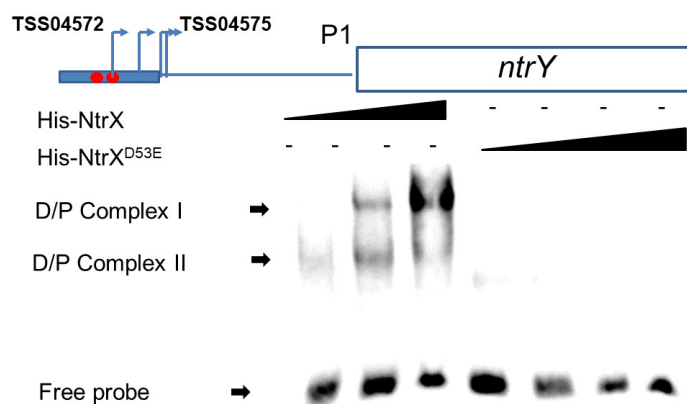

**B**

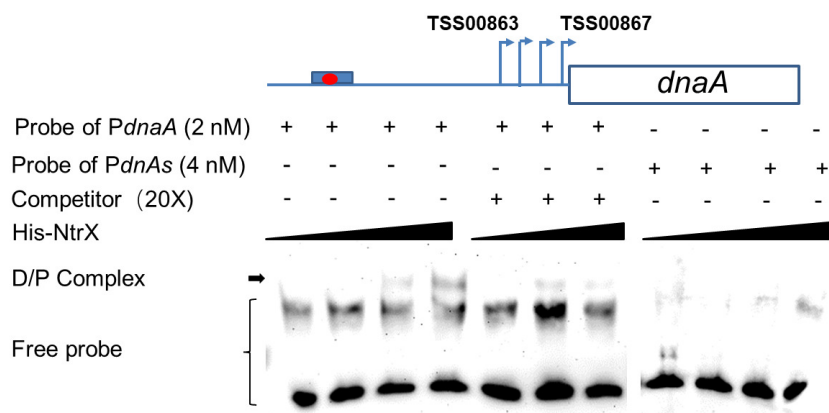

**B**

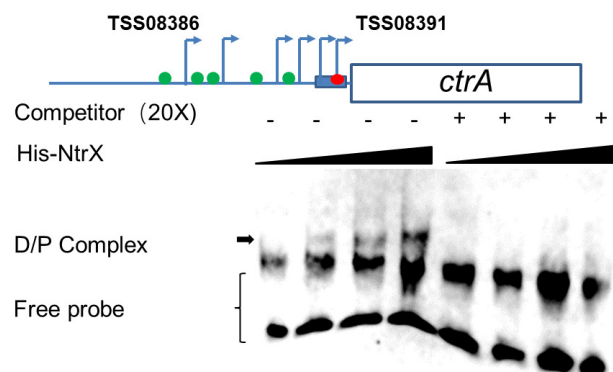

**D**

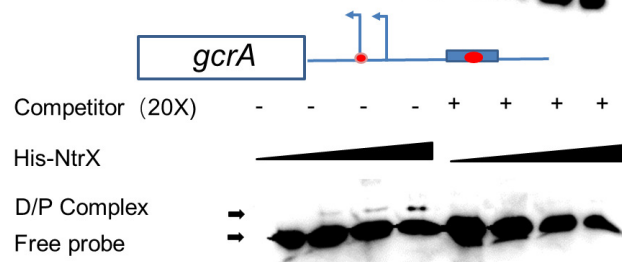

**E**

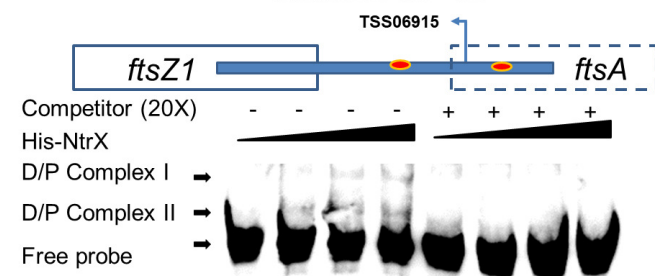



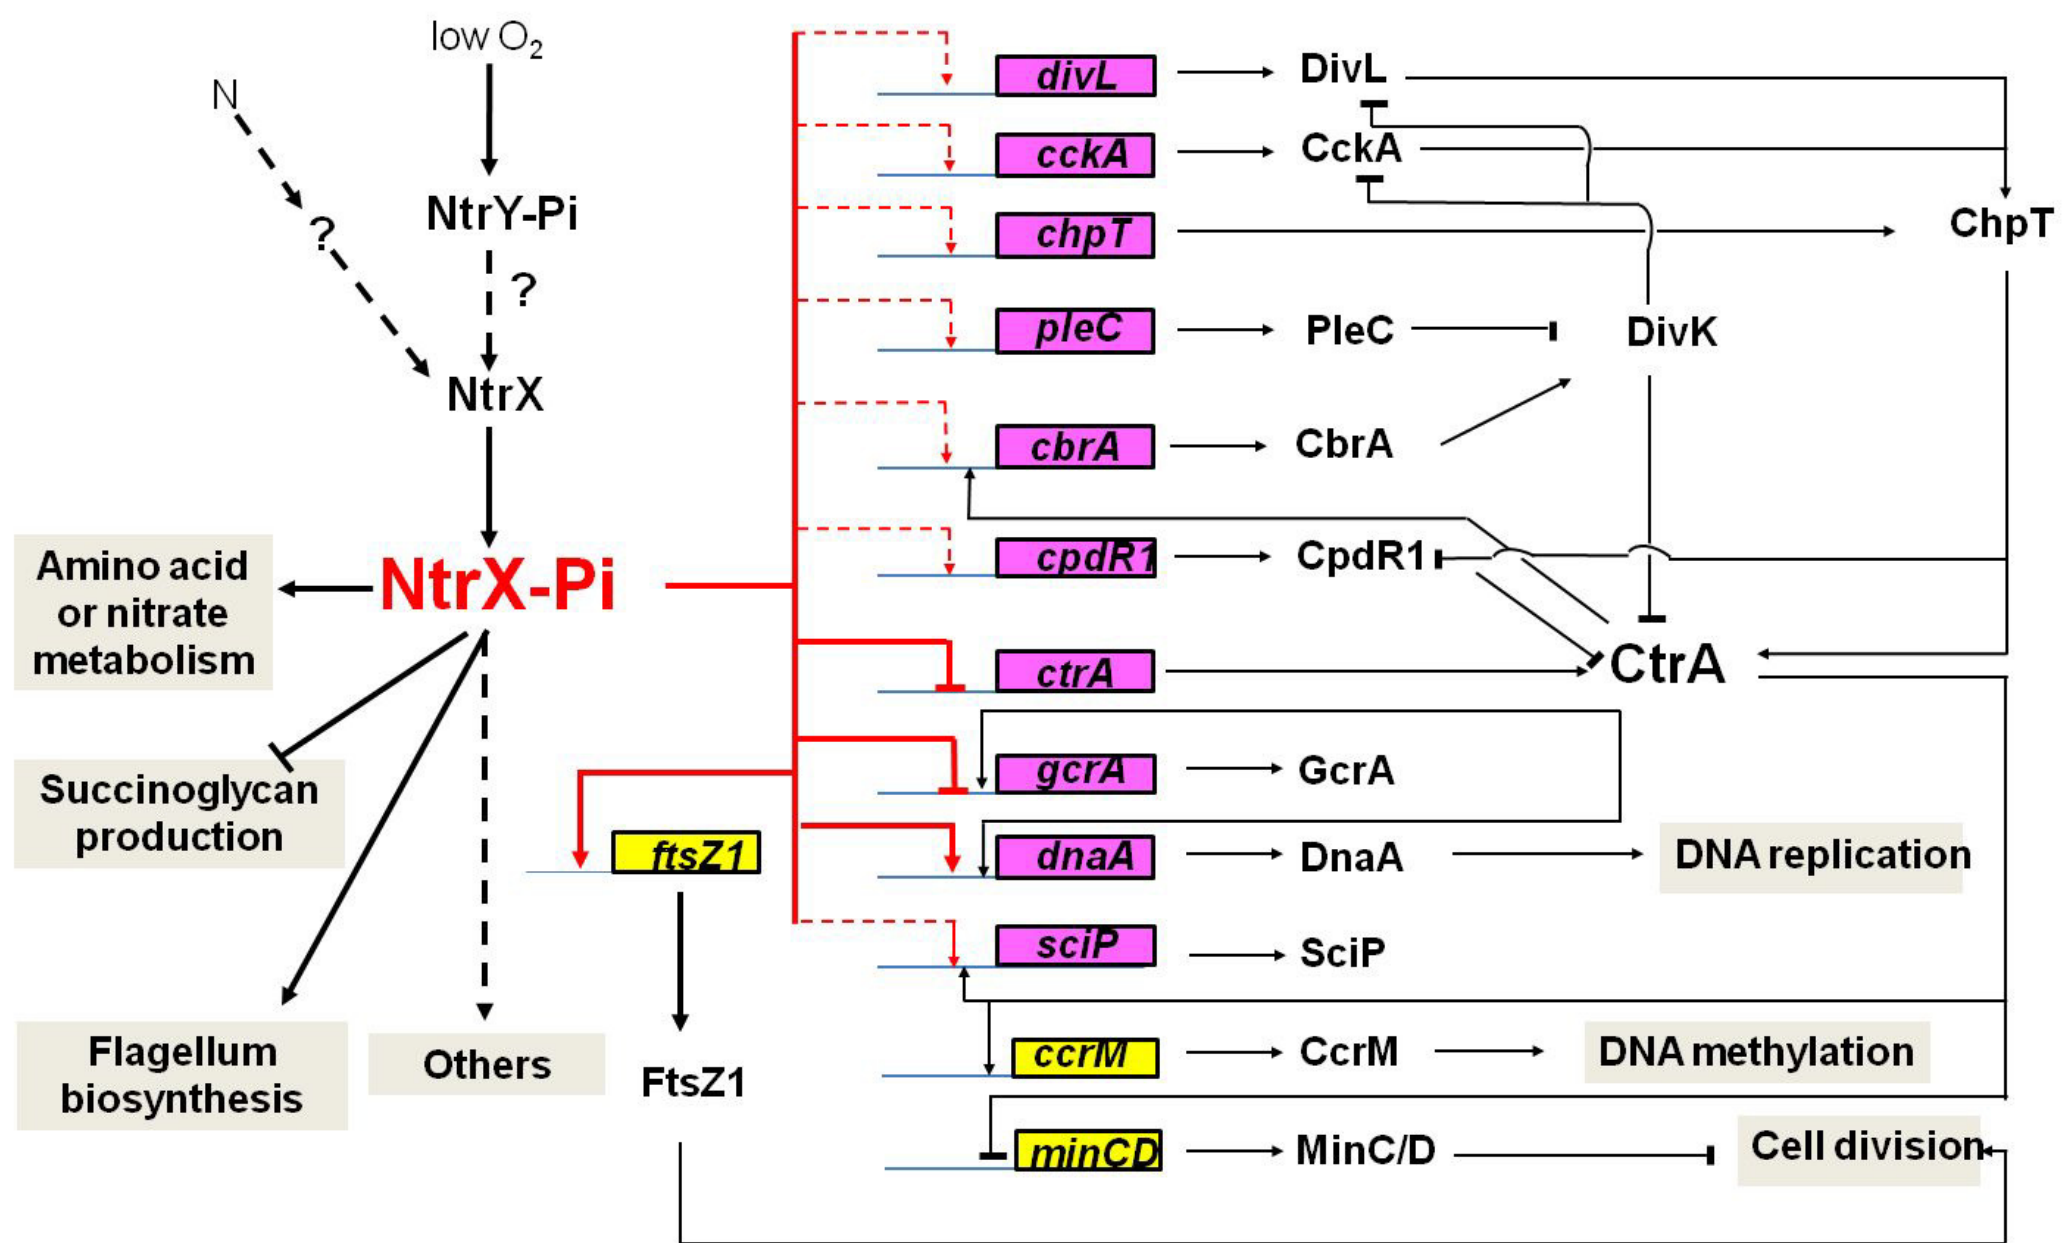

Source: https://www.biorxiv.org/content/10.1101/2021.11.15.468759v1.full.pdf
